# Supplementary material for: Aberrant FGF signaling promotes granule neuron precursor expansion in SHH subgroup infantile medulloblastoma
Source: eLife. 2025 Jan 21;13:RP100767. doi: 10.7554/eLife.100767 (PMC11750132; doi:10.7554/eLife.100767)
Supplement: Figure 1—source data 1. [file elife-100767-fig1-data1.xlsx]

## Sheet: FGF5_all
Wnt	GSM2261548	MB_SubtypeStudy_55011	4.6776	Wnt
Wnt	GSM2261551	MB_SubtypeStudy_55014	4.51449	Wnt
Wnt	GSM2261553	MB_SubtypeStudy_55016	4.719	Wnt
Wnt	GSM2261580	MB_SubtypeStudy_55043	4.53264	Wnt
Wnt	GSM2261589	MB_SubtypeStudy_55052	4.73264	Wnt
Wnt	GSM2261591	MB_SubtypeStudy_55054	4.68147	Wnt
Wnt	GSM2261609	MB_SubtypeStudy_55072	4.46132	Wnt
Wnt	GSM2261648	MB_SubtypeStudy_55111	5.47619	Wnt
Wnt	GSM2261687	MB_SubtypeStudy_55150	4.62421	Wnt
Wnt	GSM2261702	MB_SubtypeStudy_55165	4.70813	Wnt
Wnt	GSM2261706	MB_SubtypeStudy_55169	4.4056	Wnt
Wnt	GSM2261707	MB_SubtypeStudy_55170	4.62605	Wnt
Wnt	GSM2261712	MB_SubtypeStudy_55175	4.88355	Wnt
Wnt	GSM2261713	MB_SubtypeStudy_55176	4.79429	Wnt
Wnt	GSM2261715	MB_SubtypeStudy_55178	4.13835	Wnt
Wnt	GSM2261717	MB_SubtypeStudy_55180	4.59363	Wnt
Wnt	GSM2261726	MB_SubtypeStudy_55189	4.49385	Wnt
Wnt	GSM2261741	MB_SubtypeStudy_55204	4.80413	Wnt
Wnt	GSM2261752	MB_SubtypeStudy_55215	4.14905	Wnt
Wnt	GSM2261766	MB_SubtypeStudy_55229	4.99425	Wnt
Wnt	GSM2261771	MB_SubtypeStudy_55234	4.91139	Wnt
Wnt	GSM2261822	MB_SubtypeStudy_55285	4.78545	Wnt
Wnt	GSM2261837	MB_SubtypeStudy_55300	4.40588	Wnt
Wnt	GSM2261849	MB_SubtypeStudy_55312	4.1511	Wnt
Wnt	GSM2261862	MB_SubtypeStudy_55325	4.76886	Wnt
Wnt	GSM2261890	MB_SubtypeStudy_55353	4.61044	Wnt
Wnt	GSM2261905	MB_SubtypeStudy_55368	4.40354	Wnt
Wnt	GSM2261930	MB_SubtypeStudy_55392	4.16036	Wnt
Wnt	GSM2261933	MB_SubtypeStudy_55393	4.51175	Wnt
Wnt	GSM2261958	MB_SubtypeStudy_55408	4.61918	Wnt
Wnt	GSM2261971	MB_SubtypeStudy_55421	4.64106	Wnt
Wnt	GSM2261973	MB_SubtypeStudy_55423	5.14381	Wnt
Wnt	GSM2261975	MB_SubtypeStudy_55425	4.84014	Wnt
Wnt	GSM2261986	MB_SubtypeStudy_55436	4.65718	Wnt
Wnt	GSM2261990	MB_SubtypeStudy_55440	4.3091	Wnt
Wnt	GSM2262002	MB_SubtypeStudy_55452	4.63716	Wnt
Wnt	GSM2262024	MB_SubtypeStudy_55474	5.15109	Wnt
Wnt	GSM2262040	MB_SubtypeStudy_55490	5.45774	Wnt
Wnt	GSM2262069	MB_SubtypeStudy_55519	4.48187	Wnt
Wnt	GSM2262071	MB_SubtypeStudy_55521	5.95223	Wnt
Wnt	GSM2262088	MB_SubtypeStudy_55538	4.46788	Wnt
Wnt	GSM2262095	MB_SubtypeStudy_55545	4.83387	Wnt
Wnt	GSM2262113	MB_SubtypeStudy_55563	4.77683	Wnt
Wnt	GSM2262121	MB_SubtypeStudy_55571	4.88878	Wnt
Wnt	GSM2262136	MB_SubtypeStudy_55586	6.43427	Wnt
Wnt	GSM2262147	MB_SubtypeStudy_55597	4.75097	Wnt
Wnt	GSM2262154	MB_SubtypeStudy_55604	4.59361	Wnt
Wnt	GSM2262160	MB_SubtypeStudy_55610	4.88893	Wnt
Wnt	GSM2262171	MB_SubtypeStudy_55621	4.3483	Wnt
Wnt	GSM2262172	MB_SubtypeStudy_55622	4.54118	Wnt
Wnt	GSM2262197	MB_SubtypeStudy_55647	4.51562	Wnt
Wnt	GSM2262210	MB_SubtypeStudy_55660	4.65018	Wnt
Wnt	GSM2262212	MB_SubtypeStudy_55662	4.23537	Wnt
Wnt	GSM2262214	MB_SubtypeStudy_55664	4.81894	Wnt
Wnt	GSM2262220	MB_SubtypeStudy_55670	4.85786	Wnt
Wnt	GSM2262222	MB_SubtypeStudy_55672	4.10828	Wnt
Wnt	GSM2262223	MB_SubtypeStudy_55673	4.56844	Wnt
Wnt	GSM2262225	MB_SubtypeStudy_55675	4.44546	Wnt
Wnt	GSM2262230	MB_SubtypeStudy_55680	4.60253	Wnt
Wnt	GSM2262232	MB_SubtypeStudy_55682	5.49311	Wnt
Wnt	GSM2262245	MB_SubtypeStudy_55695	4.60064	Wnt
Wnt	GSM2262250	MB_SubtypeStudy_55700	5.32251	Wnt
Wnt	GSM2262252	MB_SubtypeStudy_55702	4.91668	Wnt
Wnt	GSM2262257	MB_SubtypeStudy_55707	4.57134	Wnt
Wnt	GSM2262267	MB_SubtypeStudy_55717	4.89574	Wnt
Wnt	GSM2262279	MB_SubtypeStudy_55729	4.62394	Wnt
Wnt	GSM2262280	MB_SubtypeStudy_55730	4.70717	Wnt
Wnt	GSM2262281	MB_SubtypeStudy_55731	4.55149	Wnt
Wnt	GSM2262292	MB_SubtypeStudy_55742	4.99347	Wnt
Wnt	GSM2262304	MB_SubtypeStudy_55754	4.72871	Wnt
Shh	GSM2261538	MB_SubtypeStudy_55001	8.63673	Shh
Shh	GSM2261543	MB_SubtypeStudy_55006	7.45208	Shh
Shh	GSM2261544	MB_SubtypeStudy_55007	6.49644	Shh
Shh	GSM2261547	MB_SubtypeStudy_55010	8.2635	Shh
Shh	GSM2261549	MB_SubtypeStudy_55012	5.20358	Shh
Shh	GSM2261550	MB_SubtypeStudy_55013	4.99624	Shh
Shh	GSM2261552	MB_SubtypeStudy_55015	5.42165	Shh
Shh	GSM2261567	MB_SubtypeStudy_55030	7.55151	Shh
Shh	GSM2261568	MB_SubtypeStudy_55031	5.49065	Shh
Shh	GSM2261569	MB_SubtypeStudy_55032	5.49138	Shh
Shh	GSM2261570	MB_SubtypeStudy_55033	7.10096	Shh
Shh	GSM2261571	MB_SubtypeStudy_55034	5.01828	Shh
Shh	GSM2261574	MB_SubtypeStudy_55037	4.70189	Shh
Shh	GSM2261586	MB_SubtypeStudy_55049	5.6777	Shh
Shh	GSM2261597	MB_SubtypeStudy_55060	7.90085	Shh
Shh	GSM2261598	MB_SubtypeStudy_55061	4.89954	Shh
Shh	GSM2261600	MB_SubtypeStudy_55063	6.52764	Shh
Shh	GSM2261602	MB_SubtypeStudy_55065	5.27501	Shh
Shh	GSM2261603	MB_SubtypeStudy_55066	7.59167	Shh
Shh	GSM2261614	MB_SubtypeStudy_55077	6.63136	Shh
Shh	GSM2261615	MB_SubtypeStudy_55078	4.91437	Shh
Shh	GSM2261617	MB_SubtypeStudy_55080	5.12575	Shh
Shh	GSM2261619	MB_SubtypeStudy_55082	4.57482	Shh
Shh	GSM2261620	MB_SubtypeStudy_55083	4.67764	Shh
Shh	GSM2261622	MB_SubtypeStudy_55085	5.386	Shh
Shh	GSM2261629	MB_SubtypeStudy_55092	4.75033	Shh
Shh	GSM2261633	MB_SubtypeStudy_55096	9.07295	Shh
Shh	GSM2261634	MB_SubtypeStudy_55097	7.75466	Shh
Shh	GSM2261641	MB_SubtypeStudy_55104	5.65666	Shh
Shh	GSM2261644	MB_SubtypeStudy_55107	6.06124	Shh
Shh	GSM2261647	MB_SubtypeStudy_55110	4.44075	Shh
Shh	GSM2261650	MB_SubtypeStudy_55113	4.73172	Shh
Shh	GSM2261655	MB_SubtypeStudy_55118	7.38068	Shh
Shh	GSM2261657	MB_SubtypeStudy_55120	5.55753	Shh
Shh	GSM2261658	MB_SubtypeStudy_55121	5.19182	Shh
Shh	GSM2261661	MB_SubtypeStudy_55124	4.84239	Shh
Shh	GSM2261673	MB_SubtypeStudy_55136	4.6787	Shh
Shh	GSM2261674	MB_SubtypeStudy_55137	5.37432	Shh
Shh	GSM2261680	MB_SubtypeStudy_55143	6.4056	Shh
Shh	GSM2261689	MB_SubtypeStudy_55152	8.13688	Shh
Shh	GSM2261691	MB_SubtypeStudy_55154	7.3127	Shh
Shh	GSM2261708	MB_SubtypeStudy_55171	4.80536	Shh
Shh	GSM2261709	MB_SubtypeStudy_55172	4.3841	Shh
Shh	GSM2261710	MB_SubtypeStudy_55173	5.05003	Shh
Shh	GSM2261716	MB_SubtypeStudy_55179	4.86207	Shh
Shh	GSM2261718	MB_SubtypeStudy_55181	5.19859	Shh
Shh	GSM2261719	MB_SubtypeStudy_55182	4.6311	Shh
Shh	GSM2261725	MB_SubtypeStudy_55188	4.71347	Shh
Shh	GSM2261729	MB_SubtypeStudy_55192	6.1423	Shh
Shh	GSM2261735	MB_SubtypeStudy_55198	4.66225	Shh
Shh	GSM2261738	MB_SubtypeStudy_55201	4.43943	Shh
Shh	GSM2261739	MB_SubtypeStudy_55202	5.23192	Shh
Shh	GSM2261742	MB_SubtypeStudy_55205	6.14052	Shh
Shh	GSM2261746	MB_SubtypeStudy_55209	6.04007	Shh
Shh	GSM2261747	MB_SubtypeStudy_55210	4.61573	Shh
Shh	GSM2261750	MB_SubtypeStudy_55213	4.78989	Shh
Shh	GSM2261753	MB_SubtypeStudy_55216	5.51974	Shh
Shh	GSM2261760	MB_SubtypeStudy_55223	5.92271	Shh
Shh	GSM2261762	MB_SubtypeStudy_55225	6.38959	Shh
Shh	GSM2261765	MB_SubtypeStudy_55228	8.5645	Shh
Shh	GSM2261775	MB_SubtypeStudy_55238	7.60093	Shh
Shh	GSM2261776	MB_SubtypeStudy_55239	5.05888	Shh
Shh	GSM2261780	MB_SubtypeStudy_55243	8.61672	Shh
Shh	GSM2261782	MB_SubtypeStudy_55245	4.78263	Shh
Shh	GSM2261791	MB_SubtypeStudy_55254	6.84852	Shh
Shh	GSM2261798	MB_SubtypeStudy_55261	5.79554	Shh
Shh	GSM2261800	MB_SubtypeStudy_55263	6.10715	Shh
Shh	GSM2261801	MB_SubtypeStudy_55264	5.9067	Shh
Shh	GSM2261802	MB_SubtypeStudy_55265	7.85661	Shh
Shh	GSM2261805	MB_SubtypeStudy_55268	5.16515	Shh
Shh	GSM2261807	MB_SubtypeStudy_55270	7.92233	Shh
Shh	GSM2261812	MB_SubtypeStudy_55275	6.88843	Shh
Shh	GSM2261815	MB_SubtypeStudy_55278	8.11287	Shh
Shh	GSM2261816	MB_SubtypeStudy_55279	4.89349	Shh
Shh	GSM2261817	MB_SubtypeStudy_55280	8.31046	Shh
Shh	GSM2261821	MB_SubtypeStudy_55284	5.9521	Shh
Shh	GSM2261823	MB_SubtypeStudy_55286	5.52075	Shh
Shh	GSM2261824	MB_SubtypeStudy_55287	5.75098	Shh
Shh	GSM2261826	MB_SubtypeStudy_55289	4.70195	Shh
Shh	GSM2261828	MB_SubtypeStudy_55291	4.77642	Shh
Shh	GSM2261830	MB_SubtypeStudy_55293	6.12517	Shh
Shh	GSM2261832	MB_SubtypeStudy_55295	4.71932	Shh
Shh	GSM2261834	MB_SubtypeStudy_55297	5.31561	Shh
Shh	GSM2261839	MB_SubtypeStudy_55302	5.74269	Shh
Shh	GSM2261842	MB_SubtypeStudy_55305	5.10714	Shh
Shh	GSM2261844	MB_SubtypeStudy_55307	4.43772	Shh
Shh	GSM2261851	MB_SubtypeStudy_55314	5.11017	Shh
Shh	GSM2261853	MB_SubtypeStudy_55316	7.24864	Shh
Shh	GSM2261856	MB_SubtypeStudy_55319	5.30974	Shh
Shh	GSM2261858	MB_SubtypeStudy_55321	4.77862	Shh
Shh	GSM2261859	MB_SubtypeStudy_55322	4.57697	Shh
Shh	GSM2261860	MB_SubtypeStudy_55323	6.09345	Shh
Shh	GSM2261861	MB_SubtypeStudy_55324	5.73085	Shh
Shh	GSM2261866	MB_SubtypeStudy_55329	6.19525	Shh
Shh	GSM2261867	MB_SubtypeStudy_55330	4.83032	Shh
Shh	GSM2261875	MB_SubtypeStudy_55338	5.18992	Shh
Shh	GSM2261876	MB_SubtypeStudy_55339	4.99987	Shh
Shh	GSM2261877	MB_SubtypeStudy_55340	4.14808	Shh
Shh	GSM2261888	MB_SubtypeStudy_55351	4.89449	Shh
Shh	GSM2261889	MB_SubtypeStudy_55352	4.61108	Shh
Shh	GSM2261891	MB_SubtypeStudy_55354	5.54885	Shh
Shh	GSM2261893	MB_SubtypeStudy_55356	4.53783	Shh
Shh	GSM2261894	MB_SubtypeStudy_55357	5.10961	Shh
Shh	GSM2261907	MB_SubtypeStudy_55370	5.64621	Shh
Shh	GSM2261911	MB_SubtypeStudy_55374	7.50315	Shh
Shh	GSM2261914	MB_SubtypeStudy_55377	4.91982	Shh
Shh	GSM2261915	MB_SubtypeStudy_55378	4.49896	Shh
Shh	GSM2261937	MB_SubtypeStudy_55395	7.90669	Shh
Shh	GSM2261941	MB_SubtypeStudy_55397	8.13699	Shh
Shh	GSM2261946	MB_SubtypeStudy_55400	6.15213	Shh
Shh	GSM2261949	MB_SubtypeStudy_55401	4.71454	Shh
Shh	GSM2261954	MB_SubtypeStudy_55404	5.18986	Shh
Shh	GSM2261956	MB_SubtypeStudy_55406	5.57415	Shh
Shh	GSM2261960	MB_SubtypeStudy_55410	4.61878	Shh
Shh	GSM2261961	MB_SubtypeStudy_55411	5.41668	Shh
Shh	GSM2261965	MB_SubtypeStudy_55415	9.25396	Shh
Shh	GSM2261968	MB_SubtypeStudy_55418	7.03092	Shh
Shh	GSM2261969	MB_SubtypeStudy_55419	5.46905	Shh
Shh	GSM2261970	MB_SubtypeStudy_55420	5.37732	Shh
Shh	GSM2261972	MB_SubtypeStudy_55422	5.16048	Shh
Shh	GSM2261974	MB_SubtypeStudy_55424	8.03065	Shh
Shh	GSM2261979	MB_SubtypeStudy_55429	7.9273	Shh
Shh	GSM2261982	MB_SubtypeStudy_55432	7.05523	Shh
Shh	GSM2261983	MB_SubtypeStudy_55433	7.81561	Shh
Shh	GSM2261984	MB_SubtypeStudy_55434	5.94104	Shh
Shh	GSM2261987	MB_SubtypeStudy_55437	7.44754	Shh
Shh	GSM2261993	MB_SubtypeStudy_55443	6.35426	Shh
Shh	GSM2261994	MB_SubtypeStudy_55444	6.24718	Shh
Shh	GSM2261995	MB_SubtypeStudy_55445	5.48532	Shh
Shh	GSM2261997	MB_SubtypeStudy_55447	4.46214	Shh
Shh	GSM2261999	MB_SubtypeStudy_55449	7.33461	Shh
Shh	GSM2262000	MB_SubtypeStudy_55450	6.26321	Shh
Shh	GSM2262005	MB_SubtypeStudy_55455	4.80594	Shh
Shh	GSM2262006	MB_SubtypeStudy_55456	5.21175	Shh
Shh	GSM2262008	MB_SubtypeStudy_55458	4.7513	Shh
Shh	GSM2262009	MB_SubtypeStudy_55459	5.00154	Shh
Shh	GSM2262010	MB_SubtypeStudy_55460	4.81809	Shh
Shh	GSM2262011	MB_SubtypeStudy_55461	4.82279	Shh
Shh	GSM2262012	MB_SubtypeStudy_55462	7.37789	Shh
Shh	GSM2262019	MB_SubtypeStudy_55469	5.63378	Shh
Shh	GSM2262027	MB_SubtypeStudy_55477	7.92149	Shh
Shh	GSM2262029	MB_SubtypeStudy_55479	6.01584	Shh
Shh	GSM2262037	MB_SubtypeStudy_55487	5.54285	Shh
Shh	GSM2262043	MB_SubtypeStudy_55493	8.98493	Shh
Shh	GSM2262045	MB_SubtypeStudy_55495	6.10197	Shh
Shh	GSM2262047	MB_SubtypeStudy_55497	7.32038	Shh
Shh	GSM2262050	MB_SubtypeStudy_55500	6.44549	Shh
Shh	GSM2262052	MB_SubtypeStudy_55502	4.41814	Shh
Shh	GSM2262054	MB_SubtypeStudy_55504	5.7258	Shh
Shh	GSM2262055	MB_SubtypeStudy_55505	7.21582	Shh
Shh	GSM2262057	MB_SubtypeStudy_55507	5.47992	Shh
Shh	GSM2262062	MB_SubtypeStudy_55512	8.14442	Shh
Shh	GSM2262066	MB_SubtypeStudy_55516	5.3601	Shh
Shh	GSM2262073	MB_SubtypeStudy_55523	6.55108	Shh
Shh	GSM2262074	MB_SubtypeStudy_55524	4.71156	Shh
Shh	GSM2262076	MB_SubtypeStudy_55526	8.6901	Shh
Shh	GSM2262081	MB_SubtypeStudy_55531	5.33396	Shh
Shh	GSM2262084	MB_SubtypeStudy_55534	4.482	Shh
Shh	GSM2262085	MB_SubtypeStudy_55535	4.84508	Shh
Shh	GSM2262093	MB_SubtypeStudy_55543	6.82715	Shh
Shh	GSM2262096	MB_SubtypeStudy_55546	6.00944	Shh
Shh	GSM2262099	MB_SubtypeStudy_55549	6.74962	Shh
Shh	GSM2262100	MB_SubtypeStudy_55550	8.47156	Shh
Shh	GSM2262106	MB_SubtypeStudy_55556	5.5292	Shh
Shh	GSM2262111	MB_SubtypeStudy_55561	5.13781	Shh
Shh	GSM2262115	MB_SubtypeStudy_55565	4.38399	Shh
Shh	GSM2262128	MB_SubtypeStudy_55578	5.24508	Shh
Shh	GSM2262130	MB_SubtypeStudy_55580	8.87761	Shh
Shh	GSM2262132	MB_SubtypeStudy_55582	7.78408	Shh
Shh	GSM2262135	MB_SubtypeStudy_55585	5.45288	Shh
Shh	GSM2262139	MB_SubtypeStudy_55589	6.75507	Shh
Shh	GSM2262142	MB_SubtypeStudy_55592	5.39293	Shh
Shh	GSM2262145	MB_SubtypeStudy_55595	6.0974	Shh
Shh	GSM2262151	MB_SubtypeStudy_55601	4.77853	Shh
Shh	GSM2262156	MB_SubtypeStudy_55606	7.7123	Shh
Shh	GSM2262165	MB_SubtypeStudy_55615	6.58821	Shh
Shh	GSM2262167	MB_SubtypeStudy_55617	4.718	Shh
Shh	GSM2262169	MB_SubtypeStudy_55619	4.61571	Shh
Shh	GSM2262170	MB_SubtypeStudy_55620	5.05114	Shh
Shh	GSM2262174	MB_SubtypeStudy_55624	5.43202	Shh
Shh	GSM2262178	MB_SubtypeStudy_55628	5.3982	Shh
Shh	GSM2262181	MB_SubtypeStudy_55631	7.91913	Shh
Shh	GSM2262182	MB_SubtypeStudy_55632	7.47359	Shh
Shh	GSM2262188	MB_SubtypeStudy_55638	8.02294	Shh
Shh	GSM2262189	MB_SubtypeStudy_55639	8.09514	Shh
Shh	GSM2262190	MB_SubtypeStudy_55640	6.8186	Shh
Shh	GSM2262198	MB_SubtypeStudy_55648	4.68656	Shh
Shh	GSM2262199	MB_SubtypeStudy_55649	7.22678	Shh
Shh	GSM2262202	MB_SubtypeStudy_55652	6.68032	Shh
Shh	GSM2262206	MB_SubtypeStudy_55656	5.1972	Shh
Shh	GSM2262207	MB_SubtypeStudy_55657	4.93172	Shh
Shh	GSM2262217	MB_SubtypeStudy_55667	5.80305	Shh
Shh	GSM2262218	MB_SubtypeStudy_55668	5.24285	Shh
Shh	GSM2262226	MB_SubtypeStudy_55676	4.82783	Shh
Shh	GSM2262233	MB_SubtypeStudy_55683	4.42737	Shh
Shh	GSM2262234	MB_SubtypeStudy_55684	4.88946	Shh
Shh	GSM2262236	MB_SubtypeStudy_55686	5.24963	Shh
Shh	GSM2262240	MB_SubtypeStudy_55690	6.36061	Shh
Shh	GSM2262244	MB_SubtypeStudy_55694	4.62745	Shh
Shh	GSM2262247	MB_SubtypeStudy_55697	5.80174	Shh
Shh	GSM2262248	MB_SubtypeStudy_55698	5.05854	Shh
Shh	GSM2262255	MB_SubtypeStudy_55705	4.50092	Shh
Shh	GSM2262260	MB_SubtypeStudy_55710	4.98518	Shh
Shh	GSM2262262	MB_SubtypeStudy_55712	8.3673	Shh
Shh	GSM2262269	MB_SubtypeStudy_55719	6.08002	Shh
Shh	GSM2262271	MB_SubtypeStudy_55721	5.36297	Shh
Shh	GSM2262272	MB_SubtypeStudy_55722	6.97724	Shh
Shh	GSM2262273	MB_SubtypeStudy_55723	6.60759	Shh
Shh	GSM2262277	MB_SubtypeStudy_55727	6.18763	Shh
Shh	GSM2262278	MB_SubtypeStudy_55728	5.18239	Shh
Shh	GSM2262283	MB_SubtypeStudy_55733	5.72629	Shh
Shh	GSM2262284	MB_SubtypeStudy_55734	4.6804	Shh
Shh	GSM2262285	MB_SubtypeStudy_55735	5.47562	Shh
Shh	GSM2262286	MB_SubtypeStudy_55736	4.94609	Shh
Shh	GSM2262287	MB_SubtypeStudy_55737	4.54841	Shh
Shh	GSM2262288	MB_SubtypeStudy_55738	7.56543	Shh
Shh	GSM2262289	MB_SubtypeStudy_55739	7.35023	Shh
Shh	GSM2262295	MB_SubtypeStudy_55745	8.65733	Shh
Shh	GSM2262298	MB_SubtypeStudy_55748	4.92485	Shh
Shh	GSM2262302	MB_SubtypeStudy_55752	5.4757	Shh
Shh	GSM2262306	MB_SubtypeStudy_55756	7.693	Shh
Shh	GSM2262309	MB_SubtypeStudy_55759	5.71651	Shh
Shh	GSM2262310	MB_SubtypeStudy_55760	4.41891	Shh
Shh	GSM2261539	MB_SubtypeStudy_55002	4.71756	Shh
Group 3	GSM2261545	MB_SubtypeStudy_55008	4.90799	Group 3
Group 3	GSM2261554	MB_SubtypeStudy_55017	5.20659	Group 3
Group 3	GSM2261555	MB_SubtypeStudy_55018	5.91473	Group 3
Group 3	GSM2261559	MB_SubtypeStudy_55022	6.16172	Group 3
Group 3	GSM2261560	MB_SubtypeStudy_55023	4.57682	Group 3
Group 3	GSM2261561	MB_SubtypeStudy_55024	4.83992	Group 3
Group 3	GSM2261565	MB_SubtypeStudy_55028	4.35051	Group 3
Group 3	GSM2261566	MB_SubtypeStudy_55029	5.10481	Group 3
Group 3	GSM2261577	MB_SubtypeStudy_55040	6.59242	Group 3
Group 3	GSM2261581	MB_SubtypeStudy_55044	4.47848	Group 3
Group 3	GSM2261590	MB_SubtypeStudy_55053	5.25194	Group 3
Group 3	GSM2261592	MB_SubtypeStudy_55055	4.47533	Group 3
Group 3	GSM2261593	MB_SubtypeStudy_55056	5.44356	Group 3
Group 3	GSM2261594	MB_SubtypeStudy_55057	4.30153	Group 3
Group 3	GSM2261601	MB_SubtypeStudy_55064	4.63465	Group 3
Group 3	GSM2261604	MB_SubtypeStudy_55067	4.89351	Group 3
Group 3	GSM2261605	MB_SubtypeStudy_55068	5.16681	Group 3
Group 3	GSM2261612	MB_SubtypeStudy_55075	4.41917	Group 3
Group 3	GSM2261613	MB_SubtypeStudy_55076	4.91947	Group 3
Group 3	GSM2261624	MB_SubtypeStudy_55087	4.9915	Group 3
Group 3	GSM2261625	MB_SubtypeStudy_55088	4.46608	Group 3
Group 3	GSM2261628	MB_SubtypeStudy_55091	5.00445	Group 3
Group 3	GSM2261635	MB_SubtypeStudy_55098	5.05595	Group 3
Group 3	GSM2261636	MB_SubtypeStudy_55099	5.20796	Group 3
Group 3	GSM2261642	MB_SubtypeStudy_55105	4.89063	Group 3
Group 3	GSM2261643	MB_SubtypeStudy_55106	5.64904	Group 3
Group 3	GSM2261645	MB_SubtypeStudy_55108	4.60341	Group 3
Group 3	GSM2261646	MB_SubtypeStudy_55109	5.14466	Group 3
Group 3	GSM2261649	MB_SubtypeStudy_55112	5.28348	Group 3
Group 3	GSM2261667	MB_SubtypeStudy_55130	4.62614	Group 3
Group 3	GSM2261668	MB_SubtypeStudy_55131	5.55721	Group 3
Group 3	GSM2261675	MB_SubtypeStudy_55138	4.9964	Group 3
Group 3	GSM2261676	MB_SubtypeStudy_55139	4.81394	Group 3
Group 3	GSM2261678	MB_SubtypeStudy_55141	4.54239	Group 3
Group 3	GSM2261700	MB_SubtypeStudy_55163	4.89756	Group 3
Group 3	GSM2261701	MB_SubtypeStudy_55164	4.9212	Group 3
Group 3	GSM2261711	MB_SubtypeStudy_55174	5.28478	Group 3
Group 3	GSM2261720	MB_SubtypeStudy_55183	4.93367	Group 3
Group 3	GSM2261722	MB_SubtypeStudy_55185	5.19507	Group 3
Group 3	GSM2261732	MB_SubtypeStudy_55195	4.50187	Group 3
Group 3	GSM2261734	MB_SubtypeStudy_55197	4.96154	Group 3
Group 3	GSM2261737	MB_SubtypeStudy_55200	5.2256	Group 3
Group 3	GSM2261743	MB_SubtypeStudy_55206	4.63869	Group 3
Group 3	GSM2261745	MB_SubtypeStudy_55208	4.25042	Group 3
Group 3	GSM2261748	MB_SubtypeStudy_55211	4.50036	Group 3
Group 3	GSM2261756	MB_SubtypeStudy_55219	4.62498	Group 3
Group 3	GSM2261757	MB_SubtypeStudy_55220	4.3044	Group 3
Group 3	GSM2261758	MB_SubtypeStudy_55221	4.82736	Group 3
Group 3	GSM2261763	MB_SubtypeStudy_55226	4.54055	Group 3
Group 3	GSM2261768	MB_SubtypeStudy_55231	4.65538	Group 3
Group 3	GSM2261793	MB_SubtypeStudy_55256	5.40817	Group 3
Group 3	GSM2261794	MB_SubtypeStudy_55257	4.77339	Group 3
Group 3	GSM2261797	MB_SubtypeStudy_55260	5.41696	Group 3
Group 3	GSM2261818	MB_SubtypeStudy_55281	5.14485	Group 3
Group 3	GSM2261820	MB_SubtypeStudy_55283	4.51766	Group 3
Group 3	GSM2261840	MB_SubtypeStudy_55303	5.55587	Group 3
Group 3	GSM2261841	MB_SubtypeStudy_55304	4.7257	Group 3
Group 3	GSM2261843	MB_SubtypeStudy_55306	6.12229	Group 3
Group 3	GSM2261845	MB_SubtypeStudy_55308	4.09113	Group 3
Group 3	GSM2261850	MB_SubtypeStudy_55313	6.85312	Group 3
Group 3	GSM2261855	MB_SubtypeStudy_55318	4.63018	Group 3
Group 3	GSM2261863	MB_SubtypeStudy_55326	4.61856	Group 3
Group 3	GSM2261869	MB_SubtypeStudy_55332	4.73085	Group 3
Group 3	GSM2261874	MB_SubtypeStudy_55337	4.83003	Group 3
Group 3	GSM2261878	MB_SubtypeStudy_55341	4.58379	Group 3
Group 3	GSM2261881	MB_SubtypeStudy_55344	4.87241	Group 3
Group 3	GSM2261882	MB_SubtypeStudy_55345	4.59516	Group 3
Group 3	GSM2261883	MB_SubtypeStudy_55346	4.44325	Group 3
Group 3	GSM2261885	MB_SubtypeStudy_55348	5.18194	Group 3
Group 3	GSM2261896	MB_SubtypeStudy_55359	4.54843	Group 3
Group 3	GSM2261900	MB_SubtypeStudy_55363	5.51042	Group 3
Group 3	GSM2261919	MB_SubtypeStudy_55382	4.78662	Group 3
Group 3	GSM2261926	MB_SubtypeStudy_55389	4.79442	Group 3
Group 3	GSM2261927	MB_SubtypeStudy_55390	4.70496	Group 3
Group 3	GSM2261943	MB_SubtypeStudy_55398	6.31837	Group 3
Group 3	GSM2261959	MB_SubtypeStudy_55409	4.51414	Group 3
Group 3	GSM2261978	MB_SubtypeStudy_55428	4.87648	Group 3
Group 3	GSM2261980	MB_SubtypeStudy_55430	4.6283	Group 3
Group 3	GSM2261981	MB_SubtypeStudy_55431	4.55966	Group 3
Group 3	GSM2262014	MB_SubtypeStudy_55464	5.88951	Group 3
Group 3	GSM2262015	MB_SubtypeStudy_55465	5.01614	Group 3
Group 3	GSM2262016	MB_SubtypeStudy_55466	4.70234	Group 3
Group 3	GSM2262018	MB_SubtypeStudy_55468	4.66377	Group 3
Group 3	GSM2262021	MB_SubtypeStudy_55471	4.70576	Group 3
Group 3	GSM2262022	MB_SubtypeStudy_55472	4.76514	Group 3
Group 3	GSM2262032	MB_SubtypeStudy_55482	5.17359	Group 3
Group 3	GSM2262036	MB_SubtypeStudy_55486	4.60481	Group 3
Group 3	GSM2262038	MB_SubtypeStudy_55488	5.00404	Group 3
Group 3	GSM2262039	MB_SubtypeStudy_55489	4.70411	Group 3
Group 3	GSM2262048	MB_SubtypeStudy_55498	6.08801	Group 3
Group 3	GSM2262056	MB_SubtypeStudy_55506	5.93052	Group 3
Group 3	GSM2262058	MB_SubtypeStudy_55508	4.91174	Group 3
Group 3	GSM2262065	MB_SubtypeStudy_55515	4.9362	Group 3
Group 3	GSM2262070	MB_SubtypeStudy_55520	5.13572	Group 3
Group 3	GSM2262072	MB_SubtypeStudy_55522	4.57505	Group 3
Group 3	GSM2262075	MB_SubtypeStudy_55525	4.7711	Group 3
Group 3	GSM2262079	MB_SubtypeStudy_55529	4.82603	Group 3
Group 3	GSM2262087	MB_SubtypeStudy_55537	4.74528	Group 3
Group 3	GSM2262089	MB_SubtypeStudy_55539	5.445	Group 3
Group 3	GSM2262090	MB_SubtypeStudy_55540	6.04682	Group 3
Group 3	GSM2262092	MB_SubtypeStudy_55542	4.20712	Group 3
Group 3	GSM2262097	MB_SubtypeStudy_55547	4.39966	Group 3
Group 3	GSM2262101	MB_SubtypeStudy_55551	5.21058	Group 3
Group 3	GSM2262108	MB_SubtypeStudy_55558	4.68094	Group 3
Group 3	GSM2262109	MB_SubtypeStudy_55559	4.83034	Group 3
Group 3	GSM2262110	MB_SubtypeStudy_55560	5.2633	Group 3
Group 3	GSM2262112	MB_SubtypeStudy_55562	4.76152	Group 3
Group 3	GSM2262114	MB_SubtypeStudy_55564	4.81345	Group 3
Group 3	GSM2262118	MB_SubtypeStudy_55568	4.3954	Group 3
Group 3	GSM2262125	MB_SubtypeStudy_55575	4.77857	Group 3
Group 3	GSM2262129	MB_SubtypeStudy_55579	5.62818	Group 3
Group 3	GSM2262133	MB_SubtypeStudy_55583	4.70637	Group 3
Group 3	GSM2262134	MB_SubtypeStudy_55584	4.94312	Group 3
Group 3	GSM2262137	MB_SubtypeStudy_55587	5.09779	Group 3
Group 3	GSM2262140	MB_SubtypeStudy_55590	4.58356	Group 3
Group 3	GSM2262141	MB_SubtypeStudy_55591	4.81965	Group 3
Group 3	GSM2262143	MB_SubtypeStudy_55593	5.06252	Group 3
Group 3	GSM2262150	MB_SubtypeStudy_55600	5.02622	Group 3
Group 3	GSM2262153	MB_SubtypeStudy_55603	5.42764	Group 3
Group 3	GSM2262155	MB_SubtypeStudy_55605	4.46712	Group 3
Group 3	GSM2262157	MB_SubtypeStudy_55607	5.19692	Group 3
Group 3	GSM2262158	MB_SubtypeStudy_55608	4.94572	Group 3
Group 3	GSM2262184	MB_SubtypeStudy_55634	5.07546	Group 3
Group 3	GSM2262192	MB_SubtypeStudy_55642	4.13514	Group 3
Group 3	GSM2262195	MB_SubtypeStudy_55645	4.81949	Group 3
Group 3	GSM2262204	MB_SubtypeStudy_55654	5.00404	Group 3
Group 3	GSM2262205	MB_SubtypeStudy_55655	4.68479	Group 3
Group 3	GSM2262208	MB_SubtypeStudy_55658	4.88746	Group 3
Group 3	GSM2262209	MB_SubtypeStudy_55659	4.7329	Group 3
Group 3	GSM2262229	MB_SubtypeStudy_55679	4.68726	Group 3
Group 3	GSM2262249	MB_SubtypeStudy_55699	4.69525	Group 3
Group 3	GSM2262254	MB_SubtypeStudy_55704	5.16728	Group 3
Group 3	GSM2262259	MB_SubtypeStudy_55709	4.98023	Group 3
Group 3	GSM2262261	MB_SubtypeStudy_55711	5.36804	Group 3
Group 3	GSM2262263	MB_SubtypeStudy_55713	4.792	Group 3
Group 3	GSM2262275	MB_SubtypeStudy_55725	4.97058	Group 3
Group 3	GSM2262291	MB_SubtypeStudy_55741	4.64176	Group 3
Group 3	GSM2262294	MB_SubtypeStudy_55744	5.12285	Group 3
Group 3	GSM2262296	MB_SubtypeStudy_55746	5.1251	Group 3
Group 3	GSM2262299	MB_SubtypeStudy_55749	5.31882	Group 3
Group 3	GSM2262300	MB_SubtypeStudy_55750	5.50632	Group 3
Group 3	GSM2262301	MB_SubtypeStudy_55751	5.06132	Group 3
Group 3	GSM2262308	MB_SubtypeStudy_55758	4.84952	Group 3
Group 4	GSM2261540	MB_SubtypeStudy_55003	4.78102	Group 4
Group 4	GSM2261541	MB_SubtypeStudy_55004	5.14371	Group 4
Group 4	GSM2261542	MB_SubtypeStudy_55005	5.74363	Group 4
Group 4	GSM2261546	MB_SubtypeStudy_55009	5.71706	Group 4
Group 4	GSM2261556	MB_SubtypeStudy_55019	4.52933	Group 4
Group 4	GSM2261557	MB_SubtypeStudy_55020	4.49074	Group 4
Group 4	GSM2261558	MB_SubtypeStudy_55021	4.75464	Group 4
Group 4	GSM2261562	MB_SubtypeStudy_55025	5.27014	Group 4
Group 4	GSM2261563	MB_SubtypeStudy_55026	4.71659	Group 4
Group 4	GSM2261564	MB_SubtypeStudy_55027	5.58754	Group 4
Group 4	GSM2261572	MB_SubtypeStudy_55035	5.22263	Group 4
Group 4	GSM2261573	MB_SubtypeStudy_55036	4.6419	Group 4
Group 4	GSM2261575	MB_SubtypeStudy_55038	4.56119	Group 4
Group 4	GSM2261576	MB_SubtypeStudy_55039	5.68133	Group 4
Group 4	GSM2261578	MB_SubtypeStudy_55041	5.68142	Group 4
Group 4	GSM2261579	MB_SubtypeStudy_55042	4.68512	Group 4
Group 4	GSM2261582	MB_SubtypeStudy_55045	5.40188	Group 4
Group 4	GSM2261583	MB_SubtypeStudy_55046	4.81299	Group 4
Group 4	GSM2261584	MB_SubtypeStudy_55047	6.22731	Group 4
Group 4	GSM2261585	MB_SubtypeStudy_55048	4.98527	Group 4
Group 4	GSM2261587	MB_SubtypeStudy_55050	5.08965	Group 4
Group 4	GSM2261588	MB_SubtypeStudy_55051	5.4162	Group 4
Group 4	GSM2261595	MB_SubtypeStudy_55058	5.7627	Group 4
Group 4	GSM2261596	MB_SubtypeStudy_55059	4.7898	Group 4
Group 4	GSM2261599	MB_SubtypeStudy_55062	4.77261	Group 4
Group 4	GSM2261606	MB_SubtypeStudy_55069	6.28131	Group 4
Group 4	GSM2261607	MB_SubtypeStudy_55070	5.26096	Group 4
Group 4	GSM2261608	MB_SubtypeStudy_55071	5.53902	Group 4
Group 4	GSM2261610	MB_SubtypeStudy_55073	6.16463	Group 4
Group 4	GSM2261611	MB_SubtypeStudy_55074	5.07056	Group 4
Group 4	GSM2261616	MB_SubtypeStudy_55079	4.92339	Group 4
Group 4	GSM2261618	MB_SubtypeStudy_55081	5.13855	Group 4
Group 4	GSM2261621	MB_SubtypeStudy_55084	4.55177	Group 4
Group 4	GSM2261623	MB_SubtypeStudy_55086	4.75776	Group 4
Group 4	GSM2261626	MB_SubtypeStudy_55089	4.70209	Group 4
Group 4	GSM2261627	MB_SubtypeStudy_55090	5.08151	Group 4
Group 4	GSM2261630	MB_SubtypeStudy_55093	5.2872	Group 4
Group 4	GSM2261631	MB_SubtypeStudy_55094	4.53332	Group 4
Group 4	GSM2261632	MB_SubtypeStudy_55095	5.5904	Group 4
Group 4	GSM2261637	MB_SubtypeStudy_55100	5.03903	Group 4
Group 4	GSM2261638	MB_SubtypeStudy_55101	4.89822	Group 4
Group 4	GSM2261639	MB_SubtypeStudy_55102	4.11577	Group 4
Group 4	GSM2261640	MB_SubtypeStudy_55103	5.84287	Group 4
Group 4	GSM2261651	MB_SubtypeStudy_55114	5.1058	Group 4
Group 4	GSM2261652	MB_SubtypeStudy_55115	5.11888	Group 4
Group 4	GSM2261653	MB_SubtypeStudy_55116	5.27023	Group 4
Group 4	GSM2261654	MB_SubtypeStudy_55117	4.68066	Group 4
Group 4	GSM2261656	MB_SubtypeStudy_55119	5.88985	Group 4
Group 4	GSM2261659	MB_SubtypeStudy_55122	5.22704	Group 4
Group 4	GSM2261660	MB_SubtypeStudy_55123	4.87736	Group 4
Group 4	GSM2261662	MB_SubtypeStudy_55125	5.02591	Group 4
Group 4	GSM2261663	MB_SubtypeStudy_55126	4.66964	Group 4
Group 4	GSM2261664	MB_SubtypeStudy_55127	4.86332	Group 4
Group 4	GSM2261665	MB_SubtypeStudy_55128	4.94088	Group 4
Group 4	GSM2261666	MB_SubtypeStudy_55129	4.78473	Group 4
Group 4	GSM2261669	MB_SubtypeStudy_55132	5.12827	Group 4
Group 4	GSM2261670	MB_SubtypeStudy_55133	5.61509	Group 4
Group 4	GSM2261671	MB_SubtypeStudy_55134	4.96414	Group 4
Group 4	GSM2261672	MB_SubtypeStudy_55135	4.66087	Group 4
Group 4	GSM2261677	MB_SubtypeStudy_55140	5.58708	Group 4
Group 4	GSM2261679	MB_SubtypeStudy_55142	4.84451	Group 4
Group 4	GSM2261681	MB_SubtypeStudy_55144	4.44341	Group 4
Group 4	GSM2261682	MB_SubtypeStudy_55145	5.64195	Group 4
Group 4	GSM2261683	MB_SubtypeStudy_55146	5.01275	Group 4
Group 4	GSM2261684	MB_SubtypeStudy_55147	4.8823	Group 4
Group 4	GSM2261685	MB_SubtypeStudy_55148	4.98596	Group 4
Group 4	GSM2261686	MB_SubtypeStudy_55149	5.06421	Group 4
Group 4	GSM2261688	MB_SubtypeStudy_55151	5.0417	Group 4
Group 4	GSM2261690	MB_SubtypeStudy_55153	4.79495	Group 4
Group 4	GSM2261692	MB_SubtypeStudy_55155	5.48273	Group 4
Group 4	GSM2261693	MB_SubtypeStudy_55156	4.86954	Group 4
Group 4	GSM2261694	MB_SubtypeStudy_55157	4.48083	Group 4
Group 4	GSM2261695	MB_SubtypeStudy_55158	5.10646	Group 4
Group 4	GSM2261696	MB_SubtypeStudy_55159	5.50468	Group 4
Group 4	GSM2261697	MB_SubtypeStudy_55160	4.37075	Group 4
Group 4	GSM2261698	MB_SubtypeStudy_55161	4.07403	Group 4
Group 4	GSM2261699	MB_SubtypeStudy_55162	5.13856	Group 4
Group 4	GSM2261703	MB_SubtypeStudy_55166	4.83206	Group 4
Group 4	GSM2261704	MB_SubtypeStudy_55167	4.98892	Group 4
Group 4	GSM2261705	MB_SubtypeStudy_55168	5.43719	Group 4
Group 4	GSM2261714	MB_SubtypeStudy_55177	4.8641	Group 4
Group 4	GSM2261721	MB_SubtypeStudy_55184	4.63474	Group 4
Group 4	GSM2261723	MB_SubtypeStudy_55186	6.44133	Group 4
Group 4	GSM2261724	MB_SubtypeStudy_55187	7.06914	Group 4
Group 4	GSM2261727	MB_SubtypeStudy_55190	5.08771	Group 4
Group 4	GSM2261728	MB_SubtypeStudy_55191	5.1371	Group 4
Group 4	GSM2261730	MB_SubtypeStudy_55193	4.4654	Group 4
Group 4	GSM2261731	MB_SubtypeStudy_55194	5.42851	Group 4
Group 4	GSM2261733	MB_SubtypeStudy_55196	6.0377	Group 4
Group 4	GSM2261736	MB_SubtypeStudy_55199	4.48201	Group 4
Group 4	GSM2261740	MB_SubtypeStudy_55203	5.75701	Group 4
Group 4	GSM2261744	MB_SubtypeStudy_55207	4.92306	Group 4
Group 4	GSM2261749	MB_SubtypeStudy_55212	4.86348	Group 4
Group 4	GSM2261751	MB_SubtypeStudy_55214	4.75631	Group 4
Group 4	GSM2261754	MB_SubtypeStudy_55217	6.15952	Group 4
Group 4	GSM2261755	MB_SubtypeStudy_55218	4.68804	Group 4
Group 4	GSM2261759	MB_SubtypeStudy_55222	5.16788	Group 4
Group 4	GSM2261761	MB_SubtypeStudy_55224	4.72166	Group 4
Group 4	GSM2261764	MB_SubtypeStudy_55227	4.80388	Group 4
Group 4	GSM2261767	MB_SubtypeStudy_55230	4.4583	Group 4
Group 4	GSM2261769	MB_SubtypeStudy_55232	4.49275	Group 4
Group 4	GSM2261770	MB_SubtypeStudy_55233	4.74903	Group 4
Group 4	GSM2261772	MB_SubtypeStudy_55235	4.99644	Group 4
Group 4	GSM2261773	MB_SubtypeStudy_55236	5.55007	Group 4
Group 4	GSM2261774	MB_SubtypeStudy_55237	4.60917	Group 4
Group 4	GSM2261777	MB_SubtypeStudy_55240	4.70447	Group 4
Group 4	GSM2261778	MB_SubtypeStudy_55241	4.67531	Group 4
Group 4	GSM2261779	MB_SubtypeStudy_55242	4.43797	Group 4
Group 4	GSM2261781	MB_SubtypeStudy_55244	4.56556	Group 4
Group 4	GSM2261783	MB_SubtypeStudy_55246	4.41534	Group 4
Group 4	GSM2261784	MB_SubtypeStudy_55247	5.13871	Group 4
Group 4	GSM2261785	MB_SubtypeStudy_55248	4.82487	Group 4
Group 4	GSM2261786	MB_SubtypeStudy_55249	5.68323	Group 4
Group 4	GSM2261787	MB_SubtypeStudy_55250	5.63085	Group 4
Group 4	GSM2261788	MB_SubtypeStudy_55251	4.52112	Group 4
Group 4	GSM2261789	MB_SubtypeStudy_55252	5.13677	Group 4
Group 4	GSM2261790	MB_SubtypeStudy_55253	4.55841	Group 4
Group 4	GSM2261792	MB_SubtypeStudy_55255	5.39569	Group 4
Group 4	GSM2261795	MB_SubtypeStudy_55258	5.40999	Group 4
Group 4	GSM2261796	MB_SubtypeStudy_55259	4.77954	Group 4
Group 4	GSM2261799	MB_SubtypeStudy_55262	5.98424	Group 4
Group 4	GSM2261803	MB_SubtypeStudy_55266	5.65848	Group 4
Group 4	GSM2261804	MB_SubtypeStudy_55267	4.96884	Group 4
Group 4	GSM2261806	MB_SubtypeStudy_55269	4.85256	Group 4
Group 4	GSM2261808	MB_SubtypeStudy_55271	5.07393	Group 4
Group 4	GSM2261809	MB_SubtypeStudy_55272	6.78635	Group 4
Group 4	GSM2261810	MB_SubtypeStudy_55273	4.67817	Group 4
Group 4	GSM2261811	MB_SubtypeStudy_55274	5.69164	Group 4
Group 4	GSM2261813	MB_SubtypeStudy_55276	5.24421	Group 4
Group 4	GSM2261814	MB_SubtypeStudy_55277	4.80588	Group 4
Group 4	GSM2261819	MB_SubtypeStudy_55282	4.66652	Group 4
Group 4	GSM2261825	MB_SubtypeStudy_55288	6.53869	Group 4
Group 4	GSM2261827	MB_SubtypeStudy_55290	4.83618	Group 4
Group 4	GSM2261829	MB_SubtypeStudy_55292	4.98766	Group 4
Group 4	GSM2261831	MB_SubtypeStudy_55294	4.99592	Group 4
Group 4	GSM2261833	MB_SubtypeStudy_55296	4.86468	Group 4
Group 4	GSM2261835	MB_SubtypeStudy_55298	4.67085	Group 4
Group 4	GSM2261836	MB_SubtypeStudy_55299	4.38008	Group 4
Group 4	GSM2261838	MB_SubtypeStudy_55301	6.02587	Group 4
Group 4	GSM2261846	MB_SubtypeStudy_55309	5.0044	Group 4
Group 4	GSM2261847	MB_SubtypeStudy_55310	4.73285	Group 4
Group 4	GSM2261848	MB_SubtypeStudy_55311	6.90593	Group 4
Group 4	GSM2261852	MB_SubtypeStudy_55315	5.13863	Group 4
Group 4	GSM2261854	MB_SubtypeStudy_55317	5.78629	Group 4
Group 4	GSM2261857	MB_SubtypeStudy_55320	4.93864	Group 4
Group 4	GSM2261864	MB_SubtypeStudy_55327	4.63583	Group 4
Group 4	GSM2261865	MB_SubtypeStudy_55328	5.22226	Group 4
Group 4	GSM2261868	MB_SubtypeStudy_55331	5.75095	Group 4
Group 4	GSM2261870	MB_SubtypeStudy_55333	4.6508	Group 4
Group 4	GSM2261871	MB_SubtypeStudy_55334	5.29826	Group 4
Group 4	GSM2261872	MB_SubtypeStudy_55335	5.71263	Group 4
Group 4	GSM2261873	MB_SubtypeStudy_55336	5.44898	Group 4
Group 4	GSM2261879	MB_SubtypeStudy_55342	4.64173	Group 4
Group 4	GSM2261880	MB_SubtypeStudy_55343	4.94292	Group 4
Group 4	GSM2261884	MB_SubtypeStudy_55347	5.92349	Group 4
Group 4	GSM2261886	MB_SubtypeStudy_55349	4.59662	Group 4
Group 4	GSM2261887	MB_SubtypeStudy_55350	4.45598	Group 4
Group 4	GSM2261892	MB_SubtypeStudy_55355	4.54716	Group 4
Group 4	GSM2261895	MB_SubtypeStudy_55358	5.03718	Group 4
Group 4	GSM2261897	MB_SubtypeStudy_55360	4.98118	Group 4
Group 4	GSM2261898	MB_SubtypeStudy_55361	4.58298	Group 4
Group 4	GSM2261899	MB_SubtypeStudy_55362	5.21718	Group 4
Group 4	GSM2261901	MB_SubtypeStudy_55364	5.25172	Group 4
Group 4	GSM2261902	MB_SubtypeStudy_55365	5.23912	Group 4
Group 4	GSM2261903	MB_SubtypeStudy_55366	4.50205	Group 4
Group 4	GSM2261904	MB_SubtypeStudy_55367	4.88377	Group 4
Group 4	GSM2261906	MB_SubtypeStudy_55369	5.10783	Group 4
Group 4	GSM2261908	MB_SubtypeStudy_55371	5.04174	Group 4
Group 4	GSM2261909	MB_SubtypeStudy_55372	4.63681	Group 4
Group 4	GSM2261910	MB_SubtypeStudy_55373	5.44504	Group 4
Group 4	GSM2261912	MB_SubtypeStudy_55375	4.30283	Group 4
Group 4	GSM2261913	MB_SubtypeStudy_55376	4.78536	Group 4
Group 4	GSM2261916	MB_SubtypeStudy_55379	4.96088	Group 4
Group 4	GSM2261917	MB_SubtypeStudy_55380	5.68598	Group 4
Group 4	GSM2261918	MB_SubtypeStudy_55381	4.92876	Group 4
Group 4	GSM2261920	MB_SubtypeStudy_55383	4.4028	Group 4
Group 4	GSM2261921	MB_SubtypeStudy_55384	4.65973	Group 4
Group 4	GSM2261922	MB_SubtypeStudy_55385	4.06397	Group 4
Group 4	GSM2261923	MB_SubtypeStudy_55386	5.50648	Group 4
Group 4	GSM2261924	MB_SubtypeStudy_55387	4.47827	Group 4
Group 4	GSM2261925	MB_SubtypeStudy_55388	5.58619	Group 4
Group 4	GSM2261928	MB_SubtypeStudy_55391	4.45153	Group 4
Group 4	GSM2261935	MB_SubtypeStudy_55394	4.27518	Group 4
Group 4	GSM2261939	MB_SubtypeStudy_55396	4.7997	Group 4
Group 4	GSM2261945	MB_SubtypeStudy_55399	4.96027	Group 4
Group 4	GSM2261951	MB_SubtypeStudy_55402	5.49793	Group 4
Group 4	GSM2261953	MB_SubtypeStudy_55403	4.89008	Group 4
Group 4	GSM2261955	MB_SubtypeStudy_55405	4.69084	Group 4
Group 4	GSM2261957	MB_SubtypeStudy_55407	4.83216	Group 4
Group 4	GSM2261962	MB_SubtypeStudy_55412	5.01728	Group 4
Group 4	GSM2261963	MB_SubtypeStudy_55413	4.41267	Group 4
Group 4	GSM2261964	MB_SubtypeStudy_55414	4.2452	Group 4
Group 4	GSM2261966	MB_SubtypeStudy_55416	5.13848	Group 4
Group 4	GSM2261967	MB_SubtypeStudy_55417	5.11165	Group 4
Group 4	GSM2261976	MB_SubtypeStudy_55426	5.70083	Group 4
Group 4	GSM2261977	MB_SubtypeStudy_55427	5.58707	Group 4
Group 4	GSM2261985	MB_SubtypeStudy_55435	5.14121	Group 4
Group 4	GSM2261988	MB_SubtypeStudy_55438	4.56151	Group 4
Group 4	GSM2261989	MB_SubtypeStudy_55439	5.16628	Group 4
Group 4	GSM2261991	MB_SubtypeStudy_55441	5.6841	Group 4
Group 4	GSM2261992	MB_SubtypeStudy_55442	4.49776	Group 4
Group 4	GSM2261996	MB_SubtypeStudy_55446	5.51074	Group 4
Group 4	GSM2261998	MB_SubtypeStudy_55448	4.78984	Group 4
Group 4	GSM2262001	MB_SubtypeStudy_55451	4.86804	Group 4
Group 4	GSM2262003	MB_SubtypeStudy_55453	4.44548	Group 4
Group 4	GSM2262004	MB_SubtypeStudy_55454	4.79838	Group 4
Group 4	GSM2262007	MB_SubtypeStudy_55457	4.64056	Group 4
Group 4	GSM2262013	MB_SubtypeStudy_55463	4.73464	Group 4
Group 4	GSM2262017	MB_SubtypeStudy_55467	6.60814	Group 4
Group 4	GSM2262020	MB_SubtypeStudy_55470	4.88431	Group 4
Group 4	GSM2262023	MB_SubtypeStudy_55473	4.80058	Group 4
Group 4	GSM2262025	MB_SubtypeStudy_55475	4.91897	Group 4
Group 4	GSM2262026	MB_SubtypeStudy_55476	4.5321	Group 4
Group 4	GSM2262028	MB_SubtypeStudy_55478	4.93268	Group 4
Group 4	GSM2262030	MB_SubtypeStudy_55480	4.80246	Group 4
Group 4	GSM2262031	MB_SubtypeStudy_55481	4.4028	Group 4
Group 4	GSM2262033	MB_SubtypeStudy_55483	4.77185	Group 4
Group 4	GSM2262034	MB_SubtypeStudy_55484	4.78248	Group 4
Group 4	GSM2262035	MB_SubtypeStudy_55485	5.62112	Group 4
Group 4	GSM2262041	MB_SubtypeStudy_55491	5.74535	Group 4
Group 4	GSM2262042	MB_SubtypeStudy_55492	5.56855	Group 4
Group 4	GSM2262044	MB_SubtypeStudy_55494	4.32428	Group 4
Group 4	GSM2262046	MB_SubtypeStudy_55496	5.08681	Group 4
Group 4	GSM2262049	MB_SubtypeStudy_55499	4.40102	Group 4
Group 4	GSM2262051	MB_SubtypeStudy_55501	4.99025	Group 4
Group 4	GSM2262053	MB_SubtypeStudy_55503	5.32817	Group 4
Group 4	GSM2262059	MB_SubtypeStudy_55509	4.80127	Group 4
Group 4	GSM2262060	MB_SubtypeStudy_55510	4.75837	Group 4
Group 4	GSM2262061	MB_SubtypeStudy_55511	5.25369	Group 4
Group 4	GSM2262063	MB_SubtypeStudy_55513	4.88716	Group 4
Group 4	GSM2262064	MB_SubtypeStudy_55514	4.80703	Group 4
Group 4	GSM2262067	MB_SubtypeStudy_55517	6.16271	Group 4
Group 4	GSM2262068	MB_SubtypeStudy_55518	5.33927	Group 4
Group 4	GSM2262077	MB_SubtypeStudy_55527	5.20024	Group 4
Group 4	GSM2262078	MB_SubtypeStudy_55528	5.84733	Group 4
Group 4	GSM2262080	MB_SubtypeStudy_55530	4.69919	Group 4
Group 4	GSM2262082	MB_SubtypeStudy_55532	4.74372	Group 4
Group 4	GSM2262083	MB_SubtypeStudy_55533	4.90243	Group 4
Group 4	GSM2262086	MB_SubtypeStudy_55536	5.1822	Group 4
Group 4	GSM2262091	MB_SubtypeStudy_55541	4.62692	Group 4
Group 4	GSM2262094	MB_SubtypeStudy_55544	5.38648	Group 4
Group 4	GSM2262098	MB_SubtypeStudy_55548	4.65542	Group 4
Group 4	GSM2262102	MB_SubtypeStudy_55552	5.37306	Group 4
Group 4	GSM2262103	MB_SubtypeStudy_55553	7.57546	Group 4
Group 4	GSM2262104	MB_SubtypeStudy_55554	4.2218	Group 4
Group 4	GSM2262105	MB_SubtypeStudy_55555	4.8845	Group 4
Group 4	GSM2262107	MB_SubtypeStudy_55557	5.43031	Group 4
Group 4	GSM2262116	MB_SubtypeStudy_55566	5.9583	Group 4
Group 4	GSM2262117	MB_SubtypeStudy_55567	5.17199	Group 4
Group 4	GSM2262119	MB_SubtypeStudy_55569	5.06798	Group 4
Group 4	GSM2262120	MB_SubtypeStudy_55570	5.19228	Group 4
Group 4	GSM2262122	MB_SubtypeStudy_55572	5.25772	Group 4
Group 4	GSM2262123	MB_SubtypeStudy_55573	6.43032	Group 4
Group 4	GSM2262124	MB_SubtypeStudy_55574	5.25421	Group 4
Group 4	GSM2262126	MB_SubtypeStudy_55576	5.44644	Group 4
Group 4	GSM2262127	MB_SubtypeStudy_55577	4.848	Group 4
Group 4	GSM2262131	MB_SubtypeStudy_55581	4.68637	Group 4
Group 4	GSM2262138	MB_SubtypeStudy_55588	5.87347	Group 4
Group 4	GSM2262144	MB_SubtypeStudy_55594	4.74964	Group 4
Group 4	GSM2262146	MB_SubtypeStudy_55596	4.60849	Group 4
Group 4	GSM2262148	MB_SubtypeStudy_55598	5.17893	Group 4
Group 4	GSM2262149	MB_SubtypeStudy_55599	6.38435	Group 4
Group 4	GSM2262152	MB_SubtypeStudy_55602	4.41821	Group 4
Group 4	GSM2262159	MB_SubtypeStudy_55609	5.27074	Group 4
Group 4	GSM2262161	MB_SubtypeStudy_55611	4.61771	Group 4
Group 4	GSM2262162	MB_SubtypeStudy_55612	5.03774	Group 4
Group 4	GSM2262163	MB_SubtypeStudy_55613	4.96184	Group 4
Group 4	GSM2262164	MB_SubtypeStudy_55614	5.73666	Group 4
Group 4	GSM2262166	MB_SubtypeStudy_55616	4.94573	Group 4
Group 4	GSM2262168	MB_SubtypeStudy_55618	4.54488	Group 4
Group 4	GSM2262173	MB_SubtypeStudy_55623	4.86523	Group 4
Group 4	GSM2262175	MB_SubtypeStudy_55625	4.65032	Group 4
Group 4	GSM2262176	MB_SubtypeStudy_55626	5.40996	Group 4
Group 4	GSM2262177	MB_SubtypeStudy_55627	6.08722	Group 4
Group 4	GSM2262179	MB_SubtypeStudy_55629	5.14463	Group 4
Group 4	GSM2262180	MB_SubtypeStudy_55630	5.05244	Group 4
Group 4	GSM2262183	MB_SubtypeStudy_55633	4.91303	Group 4
Group 4	GSM2262185	MB_SubtypeStudy_55635	5.04515	Group 4
Group 4	GSM2262186	MB_SubtypeStudy_55636	5.19411	Group 4
Group 4	GSM2262187	MB_SubtypeStudy_55637	5.48866	Group 4
Group 4	GSM2262191	MB_SubtypeStudy_55641	4.97178	Group 4
Group 4	GSM2262193	MB_SubtypeStudy_55643	4.55049	Group 4
Group 4	GSM2262194	MB_SubtypeStudy_55644	4.8767	Group 4
Group 4	GSM2262196	MB_SubtypeStudy_55646	6.13956	Group 4
Group 4	GSM2262200	MB_SubtypeStudy_55650	4.71366	Group 4
Group 4	GSM2262201	MB_SubtypeStudy_55651	4.73759	Group 4
Group 4	GSM2262203	MB_SubtypeStudy_55653	4.77038	Group 4
Group 4	GSM2262211	MB_SubtypeStudy_55661	4.86789	Group 4
Group 4	GSM2262213	MB_SubtypeStudy_55663	4.8366	Group 4
Group 4	GSM2262215	MB_SubtypeStudy_55665	4.56082	Group 4
Group 4	GSM2262216	MB_SubtypeStudy_55666	5.09805	Group 4
Group 4	GSM2262219	MB_SubtypeStudy_55669	6.32416	Group 4
Group 4	GSM2262221	MB_SubtypeStudy_55671	4.6819	Group 4
Group 4	GSM2262224	MB_SubtypeStudy_55674	6.83279	Group 4
Group 4	GSM2262227	MB_SubtypeStudy_55677	4.80445	Group 4
Group 4	GSM2262228	MB_SubtypeStudy_55678	5.04094	Group 4
Group 4	GSM2262231	MB_SubtypeStudy_55681	4.59997	Group 4
Group 4	GSM2262235	MB_SubtypeStudy_55685	5.01533	Group 4
Group 4	GSM2262237	MB_SubtypeStudy_55687	4.58862	Group 4
Group 4	GSM2262238	MB_SubtypeStudy_55688	4.78116	Group 4
Group 4	GSM2262239	MB_SubtypeStudy_55689	5.55437	Group 4
Group 4	GSM2262241	MB_SubtypeStudy_55691	4.6484	Group 4
Group 4	GSM2262242	MB_SubtypeStudy_55692	4.43146	Group 4
Group 4	GSM2262243	MB_SubtypeStudy_55693	5.25236	Group 4
Group 4	GSM2262246	MB_SubtypeStudy_55696	5.14701	Group 4
Group 4	GSM2262251	MB_SubtypeStudy_55701	5.15025	Group 4
Group 4	GSM2262253	MB_SubtypeStudy_55703	4.94612	Group 4
Group 4	GSM2262256	MB_SubtypeStudy_55706	4.97829	Group 4
Group 4	GSM2262258	MB_SubtypeStudy_55708	6.70155	Group 4
Group 4	GSM2262264	MB_SubtypeStudy_55714	5.14853	Group 4
Group 4	GSM2262265	MB_SubtypeStudy_55715	6.20565	Group 4
Group 4	GSM2262266	MB_SubtypeStudy_55716	5.35003	Group 4
Group 4	GSM2262268	MB_SubtypeStudy_55718	5.25786	Group 4
Group 4	GSM2262270	MB_SubtypeStudy_55720	4.70215	Group 4
Group 4	GSM2262274	MB_SubtypeStudy_55724	5.04334	Group 4
Group 4	GSM2262276	MB_SubtypeStudy_55726	6.98891	Group 4
Group 4	GSM2262282	MB_SubtypeStudy_55732	5.14012	Group 4
Group 4	GSM2262290	MB_SubtypeStudy_55740	6.46533	Group 4
Group 4	GSM2262293	MB_SubtypeStudy_55743	4.86159	Group 4
Group 4	GSM2262297	MB_SubtypeStudy_55747	4.76843	Group 4
Group 4	GSM2262303	MB_SubtypeStudy_55753	5.19551	Group 4
Group 4	GSM2262305	MB_SubtypeStudy_55755	4.50773	Group 4
Group 4	GSM2262307	MB_SubtypeStudy_55757	5.23089	Group 4
Group 4	GSM2262311	MB_SubtypeStudy_55761	5.30007	Group 4
Group 4	GSM2262312	MB_SubtypeStudy_55762	5.07588	Group 4
Group 4	GSM2262313	MB_SubtypeStudy_55763	5.88803	Group 4

## Sheet: FGF5_SHH Subgroup
	Sample	Title	FGF5			Number of Parent-derived Tissues
SHH_Alpha	GSM2261544	MB_SubtypeStudy_55007	6.49644		SHH_a	65
SHH_Alpha	GSM2261574	MB_SubtypeStudy_55037	4.70189		SHH_b	34
SHH_Alpha	GSM2261598	MB_SubtypeStudy_55061	4.89954		SHH_g	46
SHH_Alpha	GSM2261600	MB_SubtypeStudy_55063	6.52764		SHH_d	75
SHH_Alpha	GSM2261602	MB_SubtypeStudy_55065	5.27501			220
SHH_Alpha	GSM2261614	MB_SubtypeStudy_55077	6.63136
SHH_Alpha	GSM2261622	MB_SubtypeStudy_55085	5.386
SHH_Alpha	GSM2261633	MB_SubtypeStudy_55096	9.07295
SHH_Alpha	GSM2261644	MB_SubtypeStudy_55107	6.06124
SHH_Alpha	GSM2261657	MB_SubtypeStudy_55120	5.55753
SHH_Alpha	GSM2261674	MB_SubtypeStudy_55137	5.37432
SHH_Alpha	GSM2261680	MB_SubtypeStudy_55143	6.4056
SHH_Alpha	GSM2261725	MB_SubtypeStudy_55188	4.71347
SHH_Alpha	GSM2261729	MB_SubtypeStudy_55192	6.1423
SHH_Alpha	GSM2261742	MB_SubtypeStudy_55205	6.14052
SHH_Alpha	GSM2261747	MB_SubtypeStudy_55210	4.61573
SHH_Alpha	GSM2261753	MB_SubtypeStudy_55216	5.51974
SHH_Alpha	GSM2261760	MB_SubtypeStudy_55223	5.92271
SHH_Alpha	GSM2261762	MB_SubtypeStudy_55225	6.38959
SHH_Alpha	GSM2261776	MB_SubtypeStudy_55239	5.05888
SHH_Alpha	GSM2261782	MB_SubtypeStudy_55245	4.78263
SHH_Alpha	GSM2261798	MB_SubtypeStudy_55261	5.79554
SHH_Alpha	GSM2261800	MB_SubtypeStudy_55263	6.10715
SHH_Alpha	GSM2261801	MB_SubtypeStudy_55264	5.9067
SHH_Alpha	GSM2261805	MB_SubtypeStudy_55268	5.16515
SHH_Alpha	GSM2261821	MB_SubtypeStudy_55284	5.9521
SHH_Alpha	GSM2261824	MB_SubtypeStudy_55287	5.75098
SHH_Alpha	GSM2261830	MB_SubtypeStudy_55293	6.12517
SHH_Alpha	GSM2261834	MB_SubtypeStudy_55297	5.31561
SHH_Alpha	GSM2261860	MB_SubtypeStudy_55323	6.09345
SHH_Alpha	GSM2261861	MB_SubtypeStudy_55324	5.73085
SHH_Alpha	GSM2261888	MB_SubtypeStudy_55351	4.89449
SHH_Alpha	GSM2261894	MB_SubtypeStudy_55357	5.10961
SHH_Alpha	GSM2261907	MB_SubtypeStudy_55370	5.64621
SHH_Alpha	GSM2261914	MB_SubtypeStudy_55377	4.91982
SHH_Alpha	GSM2261946	MB_SubtypeStudy_55400	6.15213
SHH_Alpha	GSM2261970	MB_SubtypeStudy_55420	5.37732
SHH_Alpha	GSM2262029	MB_SubtypeStudy_55479	6.01584
SHH_Alpha	GSM2262037	MB_SubtypeStudy_55487	5.54285
SHH_Alpha	GSM2262045	MB_SubtypeStudy_55495	6.10197
SHH_Alpha	GSM2262066	MB_SubtypeStudy_55516	5.3601
SHH_Alpha	GSM2262073	MB_SubtypeStudy_55523	6.55108
SHH_Alpha	GSM2262076	MB_SubtypeStudy_55526	8.6901
SHH_Alpha	GSM2262081	MB_SubtypeStudy_55531	5.33396
SHH_Alpha	GSM2262085	MB_SubtypeStudy_55535	4.84508
SHH_Alpha	GSM2262096	MB_SubtypeStudy_55546	6.00944
SHH_Alpha	GSM2262106	MB_SubtypeStudy_55556	5.5292
SHH_Alpha	GSM2262111	MB_SubtypeStudy_55561	5.13781
SHH_Alpha	GSM2262128	MB_SubtypeStudy_55578	5.24508
SHH_Alpha	GSM2262135	MB_SubtypeStudy_55585	5.45288
SHH_Alpha	GSM2262145	MB_SubtypeStudy_55595	6.0974
SHH_Alpha	GSM2262151	MB_SubtypeStudy_55601	4.77853
SHH_Alpha	GSM2262165	MB_SubtypeStudy_55615	6.58821
SHH_Alpha	GSM2262174	MB_SubtypeStudy_55624	5.43202
SHH_Alpha	GSM2262181	MB_SubtypeStudy_55631	7.91913
SHH_Alpha	GSM2262198	MB_SubtypeStudy_55648	4.68656
SHH_Alpha	GSM2262206	MB_SubtypeStudy_55656	5.1972
SHH_Alpha	GSM2262217	MB_SubtypeStudy_55667	5.80305
SHH_Alpha	GSM2262218	MB_SubtypeStudy_55668	5.24285
SHH_Alpha	GSM2262233	MB_SubtypeStudy_55683	4.42737
SHH_Alpha	GSM2262247	MB_SubtypeStudy_55697	5.80174
SHH_Alpha	GSM2262260	MB_SubtypeStudy_55710	4.98518
SHH_Alpha	GSM2262269	MB_SubtypeStudy_55719	6.08002
SHH_Alpha	GSM2262272	MB_SubtypeStudy_55722	6.97724
SHH_Alpha	GSM2262285	MB_SubtypeStudy_55735	5.47562
SHH_Beta	GSM2261538	MB_SubtypeStudy_55001	8.63673
SHH_Beta	GSM2261543	MB_SubtypeStudy_55006	7.45208
SHH_Beta	GSM2261567	MB_SubtypeStudy_55030	7.55151
SHH_Beta	GSM2261568	MB_SubtypeStudy_55031	5.49065
SHH_Beta	GSM2261586	MB_SubtypeStudy_55049	5.6777
SHH_Beta	GSM2261603	MB_SubtypeStudy_55066	7.59167
SHH_Beta	GSM2261658	MB_SubtypeStudy_55121	5.19182
SHH_Beta	GSM2261691	MB_SubtypeStudy_55154	7.3127
SHH_Beta	GSM2261746	MB_SubtypeStudy_55209	6.04007
SHH_Beta	GSM2261765	MB_SubtypeStudy_55228	8.5645
SHH_Beta	GSM2261775	MB_SubtypeStudy_55238	7.60093
SHH_Beta	GSM2261791	MB_SubtypeStudy_55254	6.84852
SHH_Beta	GSM2261812	MB_SubtypeStudy_55275	6.88843
SHH_Beta	GSM2261815	MB_SubtypeStudy_55278	8.11287
SHH_Beta	GSM2261853	MB_SubtypeStudy_55316	7.24864
SHH_Beta	GSM2261866	MB_SubtypeStudy_55329	6.19525
SHH_Beta	GSM2261941	MB_SubtypeStudy_55397	8.13699
SHH_Beta	GSM2261956	MB_SubtypeStudy_55406	5.57415
SHH_Beta	GSM2261965	MB_SubtypeStudy_55415	9.25396
SHH_Beta	GSM2261983	MB_SubtypeStudy_55433	7.81561
SHH_Beta	GSM2261987	MB_SubtypeStudy_55437	7.44754
SHH_Beta	GSM2261994	MB_SubtypeStudy_55444	6.24718
SHH_Beta	GSM2262000	MB_SubtypeStudy_55450	6.26321
SHH_Beta	GSM2262019	MB_SubtypeStudy_55469	5.63378
SHH_Beta	GSM2262043	MB_SubtypeStudy_55493	8.98493
SHH_Beta	GSM2262047	MB_SubtypeStudy_55497	7.32038
SHH_Beta	GSM2262050	MB_SubtypeStudy_55500	6.44549
SHH_Beta	GSM2262055	MB_SubtypeStudy_55505	7.21582
SHH_Beta	GSM2262062	MB_SubtypeStudy_55512	8.14442
SHH_Beta	GSM2262093	MB_SubtypeStudy_55543	6.82715
SHH_Beta	GSM2262132	MB_SubtypeStudy_55582	7.78408
SHH_Beta	GSM2262139	MB_SubtypeStudy_55589	6.75507
SHH_Beta	GSM2262190	MB_SubtypeStudy_55640	6.8186
SHH_Beta	GSM2262273	MB_SubtypeStudy_55723	6.60759
SHH_Beta	GSM2262288	MB_SubtypeStudy_55738	7.56543
SHH_Delta	GSM2261552	MB_SubtypeStudy_55015	5.42165
SHH_Delta	GSM2261569	MB_SubtypeStudy_55032	5.49138
SHH_Delta	GSM2261571	MB_SubtypeStudy_55034	5.01828
SHH_Delta	GSM2261615	MB_SubtypeStudy_55078	4.91437
SHH_Delta	GSM2261617	MB_SubtypeStudy_55080	5.12575
SHH_Delta	GSM2261619	MB_SubtypeStudy_55082	4.57482
SHH_Delta	GSM2261620	MB_SubtypeStudy_55083	4.67764
SHH_Delta	GSM2261641	MB_SubtypeStudy_55104	5.65666
SHH_Delta	GSM2261647	MB_SubtypeStudy_55110	4.44075
SHH_Delta	GSM2261650	MB_SubtypeStudy_55113	4.73172
SHH_Delta	GSM2261661	MB_SubtypeStudy_55124	4.84239
SHH_Delta	GSM2261708	MB_SubtypeStudy_55171	4.80536
SHH_Delta	GSM2261709	MB_SubtypeStudy_55172	4.3841
SHH_Delta	GSM2261710	MB_SubtypeStudy_55173	5.05003
SHH_Delta	GSM2261716	MB_SubtypeStudy_55179	4.86207
SHH_Delta	GSM2261718	MB_SubtypeStudy_55181	5.19859
SHH_Delta	GSM2261719	MB_SubtypeStudy_55182	4.6311
SHH_Delta	GSM2261738	MB_SubtypeStudy_55201	4.43943
SHH_Delta	GSM2261739	MB_SubtypeStudy_55202	5.23192
SHH_Delta	GSM2261750	MB_SubtypeStudy_55213	4.78989
SHH_Delta	GSM2261816	MB_SubtypeStudy_55279	4.89349
SHH_Delta	GSM2261826	MB_SubtypeStudy_55289	4.70195
SHH_Delta	GSM2261828	MB_SubtypeStudy_55291	4.77642
SHH_Delta	GSM2261839	MB_SubtypeStudy_55302	5.74269
SHH_Delta	GSM2261842	MB_SubtypeStudy_55305	5.10714
SHH_Delta	GSM2261844	MB_SubtypeStudy_55307	4.43772
SHH_Delta	GSM2261856	MB_SubtypeStudy_55319	5.30974
SHH_Delta	GSM2261858	MB_SubtypeStudy_55321	4.77862
SHH_Delta	GSM2261859	MB_SubtypeStudy_55322	4.57697
SHH_Delta	GSM2261867	MB_SubtypeStudy_55330	4.83032
SHH_Delta	GSM2261876	MB_SubtypeStudy_55339	4.99987
SHH_Delta	GSM2261877	MB_SubtypeStudy_55340	4.14808
SHH_Delta	GSM2261889	MB_SubtypeStudy_55352	4.61108
SHH_Delta	GSM2261891	MB_SubtypeStudy_55354	5.54885
SHH_Delta	GSM2261893	MB_SubtypeStudy_55356	4.53783
SHH_Delta	GSM2261915	MB_SubtypeStudy_55378	4.49896
SHH_Delta	GSM2261954	MB_SubtypeStudy_55404	5.18986
SHH_Delta	GSM2261960	MB_SubtypeStudy_55410	4.61878
SHH_Delta	GSM2261961	MB_SubtypeStudy_55411	5.41668
SHH_Delta	GSM2261969	MB_SubtypeStudy_55419	5.46905
SHH_Delta	GSM2261972	MB_SubtypeStudy_55422	5.16048
SHH_Delta	GSM2261984	MB_SubtypeStudy_55434	5.94104
SHH_Delta	GSM2261995	MB_SubtypeStudy_55445	5.48532
SHH_Delta	GSM2261997	MB_SubtypeStudy_55447	4.46214
SHH_Delta	GSM2262005	MB_SubtypeStudy_55455	4.80594
SHH_Delta	GSM2262006	MB_SubtypeStudy_55456	5.21175
SHH_Delta	GSM2262008	MB_SubtypeStudy_55458	4.7513
SHH_Delta	GSM2262009	MB_SubtypeStudy_55459	5.00154
SHH_Delta	GSM2262010	MB_SubtypeStudy_55460	4.81809
SHH_Delta	GSM2262011	MB_SubtypeStudy_55461	4.82279
SHH_Delta	GSM2262052	MB_SubtypeStudy_55502	4.41814
SHH_Delta	GSM2262054	MB_SubtypeStudy_55504	5.7258
SHH_Delta	GSM2262057	MB_SubtypeStudy_55507	5.47992
SHH_Delta	GSM2262074	MB_SubtypeStudy_55524	4.71156
SHH_Delta	GSM2262115	MB_SubtypeStudy_55565	4.38399
SHH_Delta	GSM2262142	MB_SubtypeStudy_55592	5.39293
SHH_Delta	GSM2262167	MB_SubtypeStudy_55617	4.718
SHH_Delta	GSM2262169	MB_SubtypeStudy_55619	4.61571
SHH_Delta	GSM2262170	MB_SubtypeStudy_55620	5.05114
SHH_Delta	GSM2262178	MB_SubtypeStudy_55628	5.3982
SHH_Delta	GSM2262207	MB_SubtypeStudy_55657	4.93172
SHH_Delta	GSM2262226	MB_SubtypeStudy_55676	4.82783
SHH_Delta	GSM2262234	MB_SubtypeStudy_55684	4.88946
SHH_Delta	GSM2262244	MB_SubtypeStudy_55694	4.62745
SHH_Delta	GSM2262248	MB_SubtypeStudy_55698	5.05854
SHH_Delta	GSM2262255	MB_SubtypeStudy_55705	4.50092
SHH_Delta	GSM2262271	MB_SubtypeStudy_55721	5.36297
SHH_Delta	GSM2262278	MB_SubtypeStudy_55728	5.18239
SHH_Delta	GSM2262283	MB_SubtypeStudy_55733	5.72629
SHH_Delta	GSM2262284	MB_SubtypeStudy_55734	4.6804
SHH_Delta	GSM2262286	MB_SubtypeStudy_55736	4.94609
SHH_Delta	GSM2262287	MB_SubtypeStudy_55737	4.54841
SHH_Delta	GSM2262298	MB_SubtypeStudy_55748	4.92485
SHH_Delta	GSM2262302	MB_SubtypeStudy_55752	5.4757
SHH_Delta	GSM2262309	MB_SubtypeStudy_55759	5.71651
SHH_Delta	GSM2262310	MB_SubtypeStudy_55760	4.41891
SHH_Gamma	GSM2261547	MB_SubtypeStudy_55010	8.2635
SHH_Gamma	GSM2261549	MB_SubtypeStudy_55012	5.20358
SHH_Gamma	GSM2261550	MB_SubtypeStudy_55013	4.99624
SHH_Gamma	GSM2261570	MB_SubtypeStudy_55033	7.10096
SHH_Gamma	GSM2261597	MB_SubtypeStudy_55060	7.90085
SHH_Gamma	GSM2261629	MB_SubtypeStudy_55092	4.75033
SHH_Gamma	GSM2261634	MB_SubtypeStudy_55097	7.75466
SHH_Gamma	GSM2261655	MB_SubtypeStudy_55118	7.38068
SHH_Gamma	GSM2261673	MB_SubtypeStudy_55136	4.6787
SHH_Gamma	GSM2261689	MB_SubtypeStudy_55152	8.13688
SHH_Gamma	GSM2261735	MB_SubtypeStudy_55198	4.66225
SHH_Gamma	GSM2261780	MB_SubtypeStudy_55243	8.61672
SHH_Gamma	GSM2261802	MB_SubtypeStudy_55265	7.85661
SHH_Gamma	GSM2261807	MB_SubtypeStudy_55270	7.92233
SHH_Gamma	GSM2261817	MB_SubtypeStudy_55280	8.31046
SHH_Gamma	GSM2261823	MB_SubtypeStudy_55286	5.52075
SHH_Gamma	GSM2261832	MB_SubtypeStudy_55295	4.71932
SHH_Gamma	GSM2261851	MB_SubtypeStudy_55314	5.11017
SHH_Gamma	GSM2261875	MB_SubtypeStudy_55338	5.18992
SHH_Gamma	GSM2261911	MB_SubtypeStudy_55374	7.50315
SHH_Gamma	GSM2261937	MB_SubtypeStudy_55395	7.90669
SHH_Gamma	GSM2261949	MB_SubtypeStudy_55401	4.71454
SHH_Gamma	GSM2261968	MB_SubtypeStudy_55418	7.03092
SHH_Gamma	GSM2261974	MB_SubtypeStudy_55424	8.03065
SHH_Gamma	GSM2261979	MB_SubtypeStudy_55429	7.9273
SHH_Gamma	GSM2261982	MB_SubtypeStudy_55432	7.05523
SHH_Gamma	GSM2261993	MB_SubtypeStudy_55443	6.35426
SHH_Gamma	GSM2261999	MB_SubtypeStudy_55449	7.33461
SHH_Gamma	GSM2262012	MB_SubtypeStudy_55462	7.37789
SHH_Gamma	GSM2262027	MB_SubtypeStudy_55477	7.92149
SHH_Gamma	GSM2262084	MB_SubtypeStudy_55534	4.482
SHH_Gamma	GSM2262099	MB_SubtypeStudy_55549	6.74962
SHH_Gamma	GSM2262100	MB_SubtypeStudy_55550	8.47156
SHH_Gamma	GSM2262130	MB_SubtypeStudy_55580	8.87761
SHH_Gamma	GSM2262156	MB_SubtypeStudy_55606	7.7123
SHH_Gamma	GSM2262182	MB_SubtypeStudy_55632	7.47359
SHH_Gamma	GSM2262188	MB_SubtypeStudy_55638	8.02294
SHH_Gamma	GSM2262189	MB_SubtypeStudy_55639	8.09514
SHH_Gamma	GSM2262199	MB_SubtypeStudy_55649	7.22678
SHH_Gamma	GSM2262202	MB_SubtypeStudy_55652	6.68032
SHH_Gamma	GSM2262236	MB_SubtypeStudy_55686	5.24963
SHH_Gamma	GSM2262240	MB_SubtypeStudy_55690	6.36061
SHH_Gamma	GSM2262262	MB_SubtypeStudy_55712	8.3673
SHH_Gamma	GSM2262277	MB_SubtypeStudy_55727	6.18763
SHH_Gamma	GSM2262289	MB_SubtypeStudy_55739	7.35023
SHH_Gamma	GSM2262295	MB_SubtypeStudy_55745	8.65733
SHH_Gamma	GSM2262306	MB_SubtypeStudy_55756	7.693
