# Supplementary material for: Aberrant FGF signaling promotes granule neuron precursor expansion in SHH subgroup infantile medulloblastoma
Source: eLife. 2025 Jan 21;13:RP100767. doi: 10.7554/eLife.100767 (PMC11750132; doi:10.7554/eLife.100767)
Supplement: Figure 2—source data 1. [file elife-100767-fig2-data1.xlsx]

## Sheet: Fig 2B
	perimeter (um)			Table Analyzed	P0 HGS Pax6 Cbl Perimeter
	Control	Sufu-cKO
	3834.35	6825.8		Column C	Mutant
	2356.01	6317.21		vs.	vs.
	3359.09	7814.33		Column B	Control
	3907.22	4336.43
Average (um)	3364.17	6323.44		Unpaired t test
Average (mm)	3.36417	6.32344		P value	0.0109
				P value summary	*
				Significantly different (P < 0.05)?	Yes
				One- or two-tailed P value?	Two-tailed
				t, df	t=3.634, df=6
				How big is the difference?
				Mean of column A	3364
				Mean of column B	6323
				Difference between means (B - A) ± SEM	2959 ± 814.2
				95% confidence interval	966.9 to 4952
				R squared (eta squared)	0.6876
				F test to compare variances
				F, DFn, Dfd	4.192, 3, 3
				P value	0.2698
				P value summary	ns
				Significantly different (P < 0.05)?	No
				Data analyzed
				Sample size, column A	4
				Sample size, column B	4

## Sheet: Fig 2C
Control	Mutant			Unpaired t-Test
125231	695903			Table Analyzed	Total ALL Regions
335292	1.39111e+06
367624	1091016			Column B	Mutant
42422.1	580671			vs.	vs.
62775.4	1.02093e+06			Column A	Control
122768	955926
176019	955926	Average		Unpaired t test
				P value	0.0001
				P value summary	***
				Significantly different (P < 0.05)?	Yes
				One- or two-tailed P value?	Two-tailed
				t, df	t=5.933, df=10
				How big is the difference?
				Mean of column A	176019
				Mean of column B	955926
				Difference between means (B - A) ± SEM	779908 ± 131461
				95% confidence interval	486995 to 1072820
				R squared (eta squared)	0.7787
				F test to compare variances
				F, DFn, Dfd	4.281, 5, 5
				P value	0.1364
				P value summary	ns
				Significantly different (P < 0.05)?	No
				Data analyzed
				Sample size, column A	6
				Sample size, column B	6

## Sheet: Fig 2D
	Raw Data (Regions A, B, C)									Ordinary One-Way Anova
	Control - A	Mutant - A	Control - B	Mutant - B	Control - C	Mutant - C
Mouse #1	66543.3	173110	37355.9	426373	21331.9	96419.1				Table Analyzed	ALL Regions
Mouse #2	175178	573418	95584	691974	64529.5	125718				Data sets analyzed	B-G
Mouse #3	167230	341053	107352	668267	93042.5	81696
Mouse #4	2356.01	158530	17057.6	342163	23008.5	79977.7				ANOVA summary
Mouse #5	3359.09	357667	34501.8	567468	24914.5	95797.1				F	29.09
Mouse #6	60243.9	320756	35574.7	539249	26949	95921.5				P value	<0.0001
Average um2	79151.8	320756	54571	539249	42296	95921.5				P value summary	****
										Significant diff. among means (P < 0.05)?	Yes
										R squared	0.829
Multiple Comparisons Test
Number of families	1
Number of comparisons per family	15									Brown-Forsythe test
Alpha	0.05									F (DFn, DFd)	3.161 (5, 30)
										P value	0.0207
Holm-Šídák's multiple comparisons test	Mean Diff.	Below threshold?	Summary	Adjusted P Value						P value summary	*
Control - A vs. Mutant - A	-241604	Yes	***	0.0006						Are SDs significantly different (P < 0.05)?	Yes
Control - A vs. Control - B	24581	No	ns	0.9545
Control - A vs. Mutant - B	-460097	Yes	****	<0.0001						Bartlett's test
Control - A vs. Control - C	36856	No	ns	0.9434						Bartlett's statistic (corrected)	27.73
Control - A vs. Mutant - C	-16770	No	ns	0.9545						P value	<0.0001
Mutant - A vs. Control - B	266185	Yes	***	0.0002						P value summary	****
Mutant - A vs. Mutant - B	-218493	Yes	**	0.0017						Are SDs significantly different (P < 0.05)?	Yes
Mutant - A vs. Control - C	278460	Yes	***	0.0001
Mutant - A vs. Mutant - C	224834	Yes	**	0.0014						ANOVA table	SS
Control - B vs. Mutant - B	-484678	Yes	****	<0.0001						Treatment (between columns)	1202139968823
Control - B vs. Control - C	12275	No	ns	0.9545						Residual (within columns)	247915671048
Control - B vs. Mutant - C	-41350	No	ns	0.9434						Total	1450055639871	DF	MS	F (DFn, DFd)	P value
Mutant - B vs. Control - C	496953	Yes	****	<0.0001								5	240427993765	F (5, 30) = 29.09	P<0.0001
Mutant - B vs. Mutant - C	443327	Yes	****	<0.0001						Data summary		30	8263855702
Average per 10E5	-53625	No	ns	0.8968						Number of treatments (columns)	6	35
										Number of values (total)	36
Test details	Mean 1	Mean 2	Mean Diff.	SE of diff.	n1	n2	t	DF
Control - A vs. Mutant - A	79152	320756	-241604	52484	6	6	4.603	30
Control - A vs. Control - B	79152	54571	24581	52484	6	6	0.4683	30
Control - A vs. Mutant - B	79152	539249	-460097	52484	6	6	8.766	30
Control - A vs. Control - C	79152	42296	36856	52484	6	6	0.7022	30
Control - A vs. Mutant - C	79152	95921	-16770	52484	6	6	0.3195	30
Mutant - A vs. Control - B	320756	54571	266185	52484	6	6	5.072	30
Mutant - A vs. Mutant - B	320756	539249	-218493	52484	6	6	4.163	30
Mutant - A vs. Control - C	320756	42296	278460	52484	6	6	5.306	30
Mutant - A vs. Mutant - C	320756	95921	224834	52484	6	6	4.284	30
Control - B vs. Mutant - B	54571	539249	-484678	52484	6	6	9.235	30
Control - B vs. Control - C	54571	42296	12275	52484	6	6	0.2339	30
Control - B vs. Mutant - C	54571	95921	-41350	52484	6	6	0.7879	30
Mutant - B vs. Control - C	539249	42296	496953	52484	6	6	9.469	30
Mutant - B vs. Mutant - C	539249	95921	443327	52484	6	6	8.447	30
Control - C vs. Mutant - C	42296	95921	-53625	52484	6	6	1.022	30
