# Supplementary material for: Aberrant FGF signaling promotes granule neuron precursor expansion in SHH subgroup infantile medulloblastoma
Source: eLife. 2025 Jan 21;13:RP100767. doi: 10.7554/eLife.100767 (PMC11750132; doi:10.7554/eLife.100767)
Supplement: Figure 3—source data 1. [file elife-100767-fig3-data1.xlsx]

## Sheet: Fig 3C and 3D
				Ph-Erk1/2+ cells	Ph-Erk1/2+ Ki67+ cells	per 1000um2			Average per animal (per 1000um2)		Average per animal
	Sample	Filename	Area			Ph-Erk1/2+	Ph-Erk1/2+ Ki67+	%PhERK/Ki67	Ph-Erk1/2+	Ph-Erk1/2+ Ki67+	%PhERK/Ki67
Sufu-cKO	P0_24mut	Section 1	66966	67	37	1.00051	0.552519	55.2239	0.920366	0.486316	52.6119
		Section 2	45226	38	19	0.840225	0.420112	50
	P0_26MUT	Section 1	67922	59	36	0.868643	0.53002	61.0169	0.934379	0.550757	59.0799
		Section 2	69992	70	40	1.00011	0.571494	57.1429
	P0_113mut	Section 1	57731	67	32	1.16055	0.554295	47.7612	1.17819	0.548925	46.6079
		Section 2	91987	110	50	1.19582	0.543555	45.4545
controls	P0_25ctrl	Section 1	37531	10	4	0.266446	0.106579	40	0.296843	0.158474	52.1429
		Section 2	42782	14	9	0.32724	0.210369	64.2857
	P0_30Ctrl	Section 1	24200	9	4	0.371901	0.165289	44.4444	0.565972	0.263607	46.0317
		Section 2	27630	21	10	0.760043	0.361925	47.619
	P0_160ctrl	Section 1	17788	8	8	0.449741	0.449741	100	0.3546	0.332979	91.6667
		Section 2	23125	6	5	0.259459	0.216216	83.3333

## Sheet: Fig 3 Suppl 1A
Raw Data			Raw Data			Raw Data			Raw Data			Raw Data			Raw Data
Control Gli1	Mutant Gli1		Control Gli3FL	Mutant Gli3FL		Control Gli3CL	Mutant Gli3Cl		Control Gli2FL	Mutant Gli2FL		Control Gli2CL	Mutant Gli2CL		Ptch1 Control	Ptch1 kDA Mut
0.0682216	0.0160088		0.106414	0.0395833		0.0760933	0.0319079		0.205539	0.16557		0.204665	0.126096		0.115743	0.0644737
0.0320624	0.0123529		0.067591	0.0318627		0.100173	0.0278431		0.199307	0.189216		0.207972	0.158824		0.0686308	0.0505882
0.0469501	0.0154545		0.0852126	0.0405455		0.144362	0.0343636		0.28281	0.140909		0.232902	0.150909		0.0916821	0.0587273
0.0516717	0.0143411		0.0632219	0.0356589		0.0518237	0.0463566		0.232523	0.0643411		0.229483	0.0844961		0.0791793	0.0278295
Unpaired t-Test			Unpaired t-Test			Unpaired t-Test			Unpaired t-Test			Unpaired t-Test			Unpaired t-Test
Table Analyzed	Gli1/GAPDH		Table Analyzed	Gli3FL/GAPDH		Table Analyzed	Gli3CL/GAPDH		Table Analyzed	Gli2FL/GAPDH		Table Analyzed	Gli2CL/GAPDH		Table Analyzed	Ptch1/GAPDH
Column B	Mutant Gli1		Column E	Mutant Gli3FL		Column H	Mutant Gli3Cl		Column K	Mutant Gli2FL		Column N	Mutant Gli2CL		Column Q	Ptch1-Mut
vs.	vs.		vs.	vs.		vs.	vs.		vs.	vs.		vs.	vs.		vs.	vs.
Column A	Control Gli1		Column D	Control Gli3FL		Column G	Control Gli3CL		Column J	Control Gli2FL		Column M	Control Gli2CL		Column P	Ptch1- Control
Unpaired t test			Unpaired t test			Unpaired t test			Unpaired t test			Unpaired t test			Unpaired t test
P value	0.0033		P value	0.0048		P value	0.028		P value	0.0346		P value	0.0028		P value	0.0251
P value summary	**		P value summary	**		P value summary	*		P value summary	*		P value summary	**		P value summary	*
Significantly different (P < 0.05)?	Yes		Significantly different (P < 0.05)?	Yes		Significantly different (P < 0.05)?	Yes		Significantly different (P < 0.05)?	Yes		Significantly different (P < 0.05)?	Yes		Significantly different (P < 0.05)?	Yes
One- or two-tailed P value?	Two-tailed		One- or two-tailed P value?	Two-tailed		One- or two-tailed P value?	Two-tailed		One- or two-tailed P value?	Two-tailed		One- or two-tailed P value?	Two-tailed		One- or two-tailed P value?	Two-tailed
t, df	t=4.697, df=6		t, df	t=4.358, df=6		t, df	t=2.882, df=6		t, df	t=2.721, df=6		t, df	t=4.867, df=6		t, df	t=2.967, df=6
How big is the difference?			How big is the difference?			How big is the difference?			How big is the difference?			How big is the difference?			How big is the difference?
Mean of Control Gli1	0.04973		Mean of Control Gli3FL	0.08061		Mean of Control Gli3CL	0.09311		Mean of Control Gli2FL	0.23		Mean of Control Gli2CL	0.2188		Mean of Ptch1- Control	0.08881
Mean of Mutant Gli1	0.01454		Mean of Mutant Gli3FL	0.03691		Mean of Mutant Gli3Cl	0.03512		Mean of Mutant Gli2FL	0.14		Mean of Mutant Gli2CL	0.1301		Mean of Ptch1-Mut	0.0504
Difference between means (B - A) ± SEM	-0.03519 ± 0.007491		Difference between means (B - A) ± SEM	-0.04370 ± 0.01003		Difference between means (B - A) ± SEM	-0.05800 ± 0.02013		Difference between means (B - A) ± SEM	-0.09004 ± 0.03309		Difference between means (B - A) ± SEM	-0.08867 ± 0.01822		Difference between means (B - A) ± SEM	-0.03840 ± 0.01294
95% confidence interval	-0.05352 to -0.01686		95% confidence interval	-0.06823 to -0.01916		95% confidence interval	-0.1072 to -0.008748		95% confidence interval	-0.1710 to -0.009075		95% confidence interval	-0.1333 to -0.04409		95% confidence interval	-0.07008 to -0.006732
R squared (eta squared)	0.7862		R squared (eta squared)	0.76		R squared (eta squared)	0.5805		R squared (eta squared)	0.5524		R squared (eta squared)	0.7979		R squared (eta squared)	0.5947
F test to compare variances			F test to compare variances			F test to compare variances			F test to compare variances			F test to compare variances			F test to compare variances
F, DFn, Dfd	85.15, 3, 3		F, DFn, Dfd	24.45, 3, 3		F, DFn, Dfd	24.57, 3, 3		F, DFn, Dfd	2.030, 3, 3		F, DFn, Dfd	5.323, 3, 3		F, DFn, Dfd	1.588, 3, 3
P value	0.0042		P value	0.0261		P value	0.0259		P value	0.5757		P value	0.2031		P value	0.7133
P value summary	**		P value summary	*		P value summary	*		P value summary	ns		P value summary	ns		P value summary	ns
Significantly different (P < 0.05)?	Yes		Significantly different (P < 0.05)?	Yes		Significantly different (P < 0.05)?	Yes		Significantly different (P < 0.05)?	No		Significantly different (P < 0.05)?	No		Significantly different (P < 0.05)?	No
