# Supplementary material for: Aberrant FGF signaling promotes granule neuron precursor expansion in SHH subgroup infantile medulloblastoma
Source: eLife. 2025 Jan 21;13:RP100767. doi: 10.7554/eLife.100767 (PMC11750132; doi:10.7554/eLife.100767)
Supplement: Figure 4—source data 1. [file elife-100767-fig4-data1.xlsx]

## Sheet: Fig 4B
Raw Data
Cntrl A per 100um	Mutant A Per 100um	Cntrl B per 100um	Mut B per 100um	Cntrl C per 100um	Mut C per 100um					Ordinary One way Anova
0.00348869	0.0145549	0.00106841	0.0301843	0.00873045	0.00309861					Table Analyzed	gH2AX v2
0	0.00468384	0.00615047	0.00421701	0.00615047	0.00396005					Data sets analyzed	A-F
0.00723475	0.00763169	0.00500729	0.017914	0.00597726	0.00668969
0	0.0187823	0.00374922	0.0512893	0.0023873	0.033018					ANOVA summary
0	0.0206392	0	0.0356087	0.00191865	0.0131312					F	5.103
										P value	0.0025
										P value summary	**
Multiple Comparisons										Significant diff. among means (P < 0.05)?	Yes
Number of families	1									R squared	0.5153
Number of comparisons per family	3
Alpha	0.05									Brown-Forsythe test
										F (DFn, DFd)	2.235 (5, 24)
Holm-Šídák's multiple comparisons test	Mean Diff.	Below threshold?	Summary	Adjusted P Value						P value	0.0836
Cntrl A per 100um vs. Mutant A Per 100um	-0.01111	No	ns	0.1492	A-B					P value summary	ns
Cntrl B per 100um vs. Mut B per 100um	-0.02465	Yes	**	0.0013	C-D					Are SDs significantly different (P < 0.05)?	No
Cntrl C per 100um vs. Mut C per 100um	-0.006947	No	ns	0.2605	E-F
										Bartlett's test
Test details	Mean 1	Mean 2	Mean Diff.	SE of diff.	n1	n2	t	DF		Bartlett's statistic (corrected)	22.02
Cntrl A per 100um vs. Mutant A Per 100um	0.002145	0.01326	-0.01111	0.006028	5	5	1.844	24		P value	0.0005
Cntrl B per 100um vs. Mut B per 100um	0.003195	0.02784	-0.02465	0.006028	5	5	4.089	24		P value summary	***
Cntrl C per 100um vs. Mut C per 100um	0.005033	0.01198	-0.006947	0.006028	5	5	1.152	24		Are SDs significantly different (P < 0.05)?	Yes
												DF	MS	F (DFn, DFd)	P value
										ANOVA table	SS	5	0.0004636	F (5, 24) = 5.103	P=0.0025
										Treatment (between columns)	0.002318	24	9.085e-05
										Residual (within columns)	0.00218	29
										Total	0.004498
										Data summary
										Number of treatments (columns)	6
										Number of values (total)	30

## Sheet: Fig 4C
Control p53	Mutant p53		Unpaired t-Test
0.0311958	0.0243421		Table Analyzed	p53/GAPDH
0.0426987	0.0244118
0.0471125	0.035		Column B	Mutant p53
	0.0216279		vs.	vs.
			Column A	Control p53
			Unpaired t test
			P value	0.0457
			P value summary	*
			Significantly different (P < 0.05)?	Yes
			One- or two-tailed P value?	Two-tailed
			t, df	t=2.644, df=5
			How big is the difference?
			Mean of column A	0.04034
			Mean of column B	0.02635
			Difference between means (B - A) ± SEM	-0.01399 ± 0.005291
			95% confidence interval	-0.02759 to -0.0003893
			R squared (eta squared)	0.583
			F test to compare variances
			F, DFn, Dfd	1.931, 2, 3
			P value	0.5782
			P value summary	ns
			Significantly different (P < 0.05)?	No
			Data analyzed
			Sample size, column A	3
			Sample size, column B	4

## Sheet: Fig 4 Suppl 1
Raw Data
Cntrl A per 100um	Mutant A Per 100um	Cntrl B per 100um	Mut B per 100um	Cntrl C per 100um	Mut C per 100um					Ordinary One-Way ANOVA
0.00348869	0.0128313	0.00106841	0.0148282	0.00639439	0.0015493					Table Analyzed	P0 Cl-Casp gH2AX
0	0.00218901	0.00505765	0.00374191	0.00396328	0.00136418					Data sets analyzed	A-F
0.00193039	0.0053425	0.00500729	0.0147285	0.00298863	0.0037299
0	0.00595377	0.00374922	0.0212775	0	0.00820668					ANOVA summary
0	0.0106568	0	0.0167052	0.00151512	0.00378219					F	8.521
										P value	<0.0001
Multiple Comparisons										P value summary	****
Number of families	1									Significant diff. among means (P < 0.05)?	Yes
Number of comparisons per family	3									R squared	0.6397
Alpha	0.05
										Brown-Forsythe test
Holm-Šídák's multiple comparisons test	Mean Diff.	Below threshold?	Summary	Adjusted P Value						F (DFn, DFd)	0.8134 (5, 24)
Cntrl A per 100um vs. Mutant A Per 100um	-0.006311	Yes	*	0.0243	A-B					P value	0.5518
Cntrl B per 100um vs. Mut B per 100um	-0.01128	Yes	***	0.0002	C-D					P value summary	ns
Cntrl C per 100um vs. Mut C per 100um	-0.0007542	No	ns	0.7489	E-F					Are SDs significantly different (P < 0.05)?	No
Test details	Mean 1	Mean 2	Mean Diff.	SE of diff.	n1	n2	t	DF		Bartlett's test
Cntrl A per 100um vs. Mutant A Per 100um	0.001084	0.007395	-0.006311	0.00233	5	5	2.709	24		Bartlett's statistic (corrected)	9.47
Cntrl B per 100um vs. Mut B per 100um	0.002977	0.01426	-0.01128	0.00233	5	5	4.842	24		P value	0.0917
Cntrl C per 100um vs. Mut C per 100um	0.002972	0.003726	-0.0007542	0.00233	5	5	0.3237	24		P value summary	ns
										Are SDs significantly different (P < 0.05)?	No
													MS	F (DFn, DFd)	P value
										ANOVA table	SS	DF	0.0001156	F (5, 24) = 8.521	P<0.0001
										Treatment (between columns)	0.000578	5	1.357e-05
										Residual (within columns)	0.0003256	24
										Total	0.0009037	29
										Data summary
										Number of treatments (columns)	6
										Number of values (total)	30
